# Supplementary material for: Cryo-EM structure of the human Kv3.1 channel reveals gating control by the cytoplasmic T1 domain
Source: Research Square preprint supplement (doi:10.21203/rs.3.rs-828003/v1), 2021-09-09
Supplement: Supplementary file 1 [file 125050595ee9c579c96ae5d0.pdf]

# **Cryo-EM structure of the human Kv3.1 channel reveals gating control by the cytoplasmic T1 domain**

Gamma Chi<sup>1,8</sup>, Qiansheng Liang<sup>2</sup>, Akshay Sridhar<sup>3</sup>, Kasim Sader<sup>4</sup>, Mazdak Radjainia<sup>5</sup>, Pu Qian<sup>4</sup>, Pablo Castro-Hartmann<sup>4</sup>, Shayla Venkaya<sup>1,6</sup>, Nanki Kaur Singh<sup>1</sup>, Gavin McKinley<sup>1</sup>, Alejandra Fernandez-Cid<sup>1</sup>, Shubhashish M. M. Mukhopadhyay<sup>1</sup>, Nicola A. Burgess-Brown<sup>1</sup>, Lucie Delemotte<sup>3</sup>, Manuel Covarrubias<sup>2</sup> and Katharina L. Dürr<sup>1,7,8,‡</sup>

<sup>1</sup> Centre for Medicines Discovery, Nuffield Department of Medicine, University of Oxford, Roosevelt Drive, Oxford, OX3 7DQ, UK

<sup>2</sup> Department of Neuroscience and Vickie and Jack Farber Institute for Neuroscience, Sidney Kimmel Medical College at Thomas Jefferson University, Philadelphia, PA 19107

<sup>3</sup> Department of Applied Physics, Science for Life Laboratory, KTH, Solna, Sweden

<sup>4</sup> Materials and Structural Analysis, Thermo Fisher Scientific, Achtseweg Noord 5, 5651 GG Eindhoven, Netherlands

<sup>5</sup> Thermofisher Scientific, Achtseweg Noord 5, 5651 GG Eindhoven, Netherlands

<sup>6</sup> Present address: Exscientia Ltd., The Schrödinger Building, Heatley Road, The Oxford Science Park, Oxford, OX4 4GE

<sup>7</sup> Present address: OMass Therapeutics, Ltd., The Schrödinger Building, Heatley Road, The Oxford Science Park, Oxford, OX4 4GE, UK

<sup>8</sup> Structural Genomics Consortium, Nuffield Department of Medicine, University of Oxford, Roosevelt Drive, Oxford, OX3 7DQ, UK

‡ correspondence should be addressed to: [katharina.duerr@cmd.ox.ac.uk](mailto:katharina.duerr@cmd.ox.ac.uk)

## Table of Contents

|                                                                                                                                                                                                                       |           |
|-----------------------------------------------------------------------------------------------------------------------------------------------------------------------------------------------------------------------|-----------|
| <b>Suppl. Figure S1:</b> <i>Sequence alignment of human Kv3.1a with other human Kv channels.....</i>                                                                                                                  | <i>3</i>  |
| <b>Suppl. Table 1:</b> <i>Data acquisition and processing parameters and model refinement statistics for Kv3.1a datasets collected under apo, Zn<sup>2+</sup>-free and Zn<sup>2+</sup>-containing conditions.....</i> | <i>5</i>  |
| <b>Suppl. Figure S2:</b> <i>Purification and cryo-EM analysis of Kv3.1a under apo conditions.....</i>                                                                                                                 | <i>6</i>  |
| <b>Suppl. Figure S3:</b> <i>Cryo-EM data processing of Kv3.1a in presence of EDTA or ZnCl<sub>2</sub>.....</i>                                                                                                        | <i>7</i>  |
| <b>Suppl. Figure S4:</b> <i>EM density maps for representative segments of Kv3.1a.....</i>                                                                                                                            | <i>8</i>  |
| <b>Suppl. Figure S5:</b> <i>Detailed mapping of disease mutations in the human KCNC1 gene linked to EPM7 and related epileptic encephalopathies.....</i>                                                              | <i>9</i>  |
| <b>Suppl. Figure S6:</b> <i>T1 domain superposition of Kv3.1a with Kv1.3 (+β2.1) and Kv1.2-2.1.....</i>                                                                                                               | <i>10</i> |
| <b>Suppl. Figure S7:</b> <i>C-terminal extension (ATM) interacts with two adjacent subunits from T1.....</i>                                                                                                          | <i>11</i> |
| <b>Suppl. Figure S8:</b> <i>Comparison of the Kv3.1a cryo-EM structure to model predicted by Alpha-Fold2 shows differences in the arrangement of S4 and the S4/S5 linker.....</i>                                     | <i>12</i> |
| <b>Suppl. Figure S8:</b> <i>Comparison of electrostatic surface potential distribution for human Kv channel structures of Kv3.1a, Kv1.2-2.1 and Kv1.3.....</i>                                                        | <i>13</i> |
| <b>Suppl. Figure S10:</b> <i>Comparison of electrostatic surface charges near α4 in T1 of Kv3.1a and in T1 domains from representative channels of the Kv1 and Kv4 subfamilies.....</i>                               | <i>14</i> |
| <b>Suppl. Figure S11:</b> <i>Pore hydration properties and role of D81 (T1 domain) for increasing K<sup>+</sup> occupancy at the interstitial fenestrations of Kv3.1A.....</i>                                        | <i>15</i> |
| <b>Suppl. Figure S12:</b> <i>TEVC recordings of Kv3.1a channels in Xenopus oocytes.....</i>                                                                                                                           | <i>16</i> |
| <b>Suppl. Figure S13:</b> <i>Analysis of lipid/protein interactions in the human Kv3.1a channel.....</i>                                                                                                              | <i>17</i> |
| <b>Suppl. Figure S14:</b> <i>Illustration of dimer interface interactions for a subset of particles forming Kv3.1a dimers in the dataset with 400 μM ZnCl<sub>2</sub>.....</i>                                        | <i>18</i> |
| <i>Supplementary results and discussion.....</i>                                                                                                                                                                      | <i>19</i> |
| <i>References.....</i>                                                                                                                                                                                                | <i>20</i> |

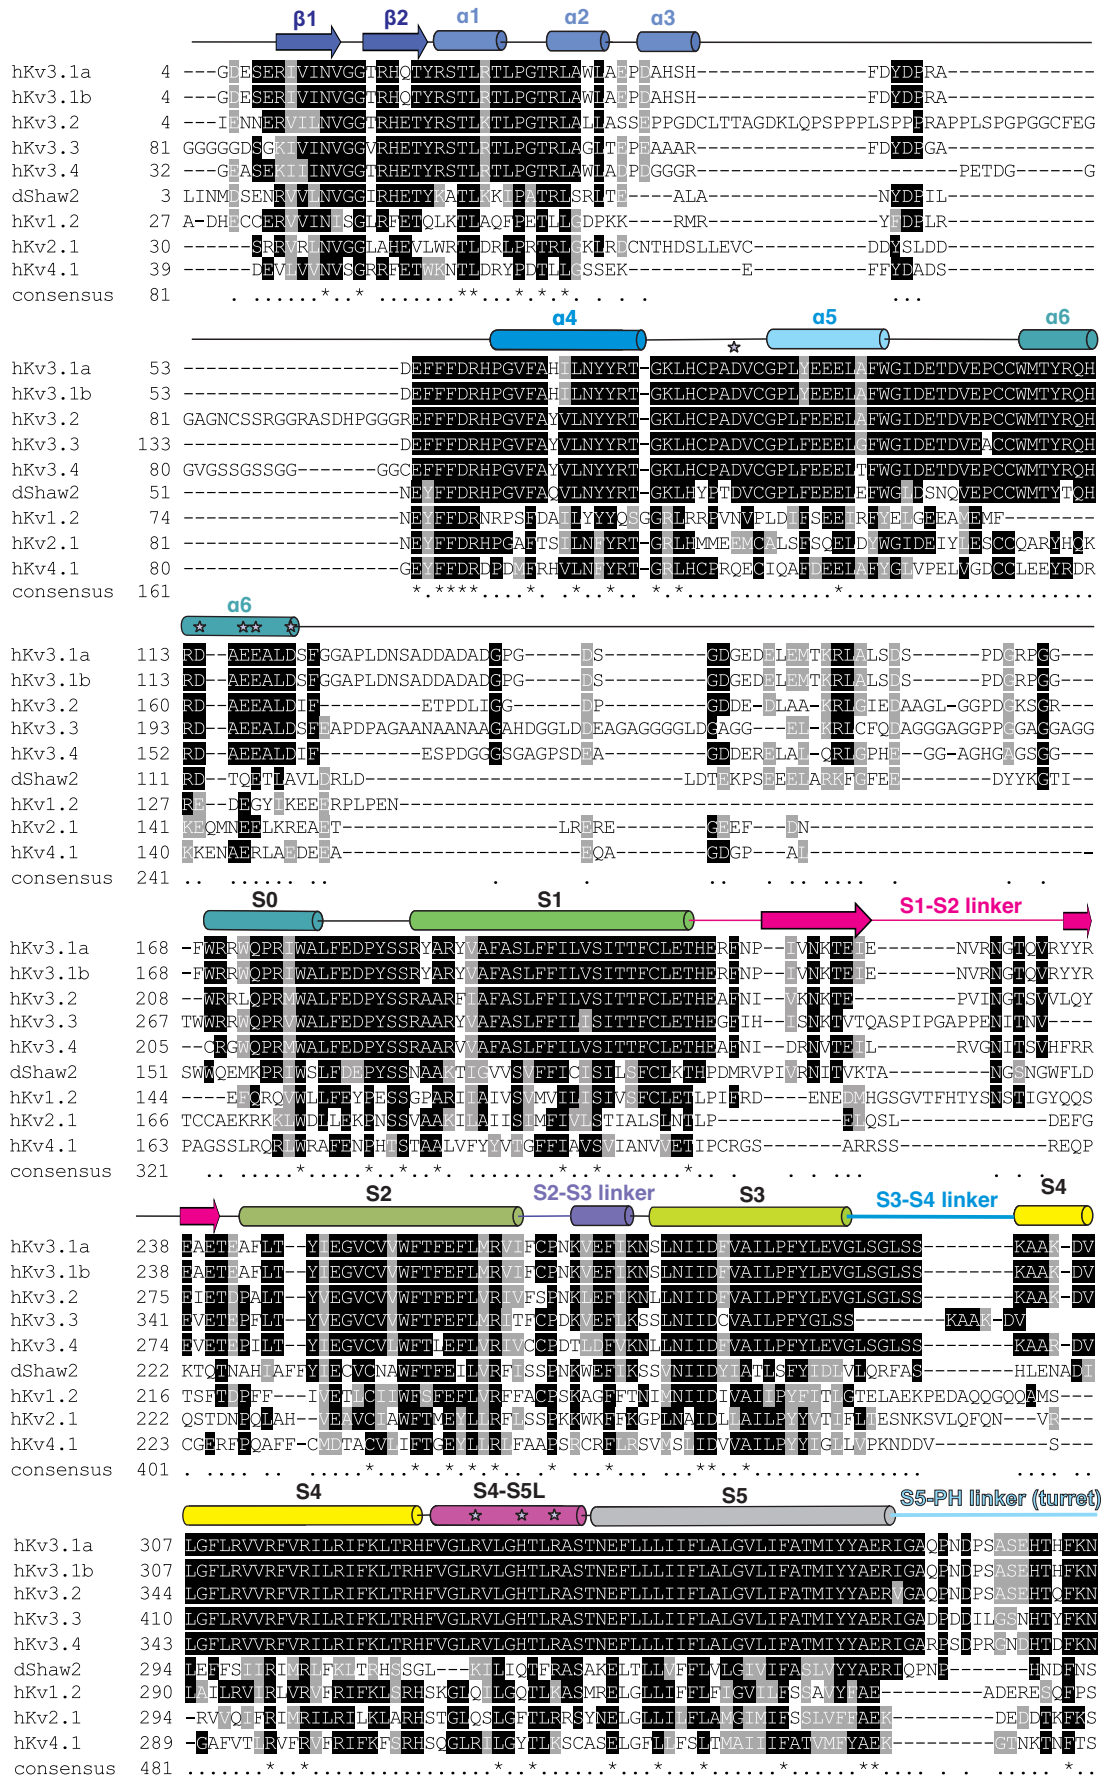

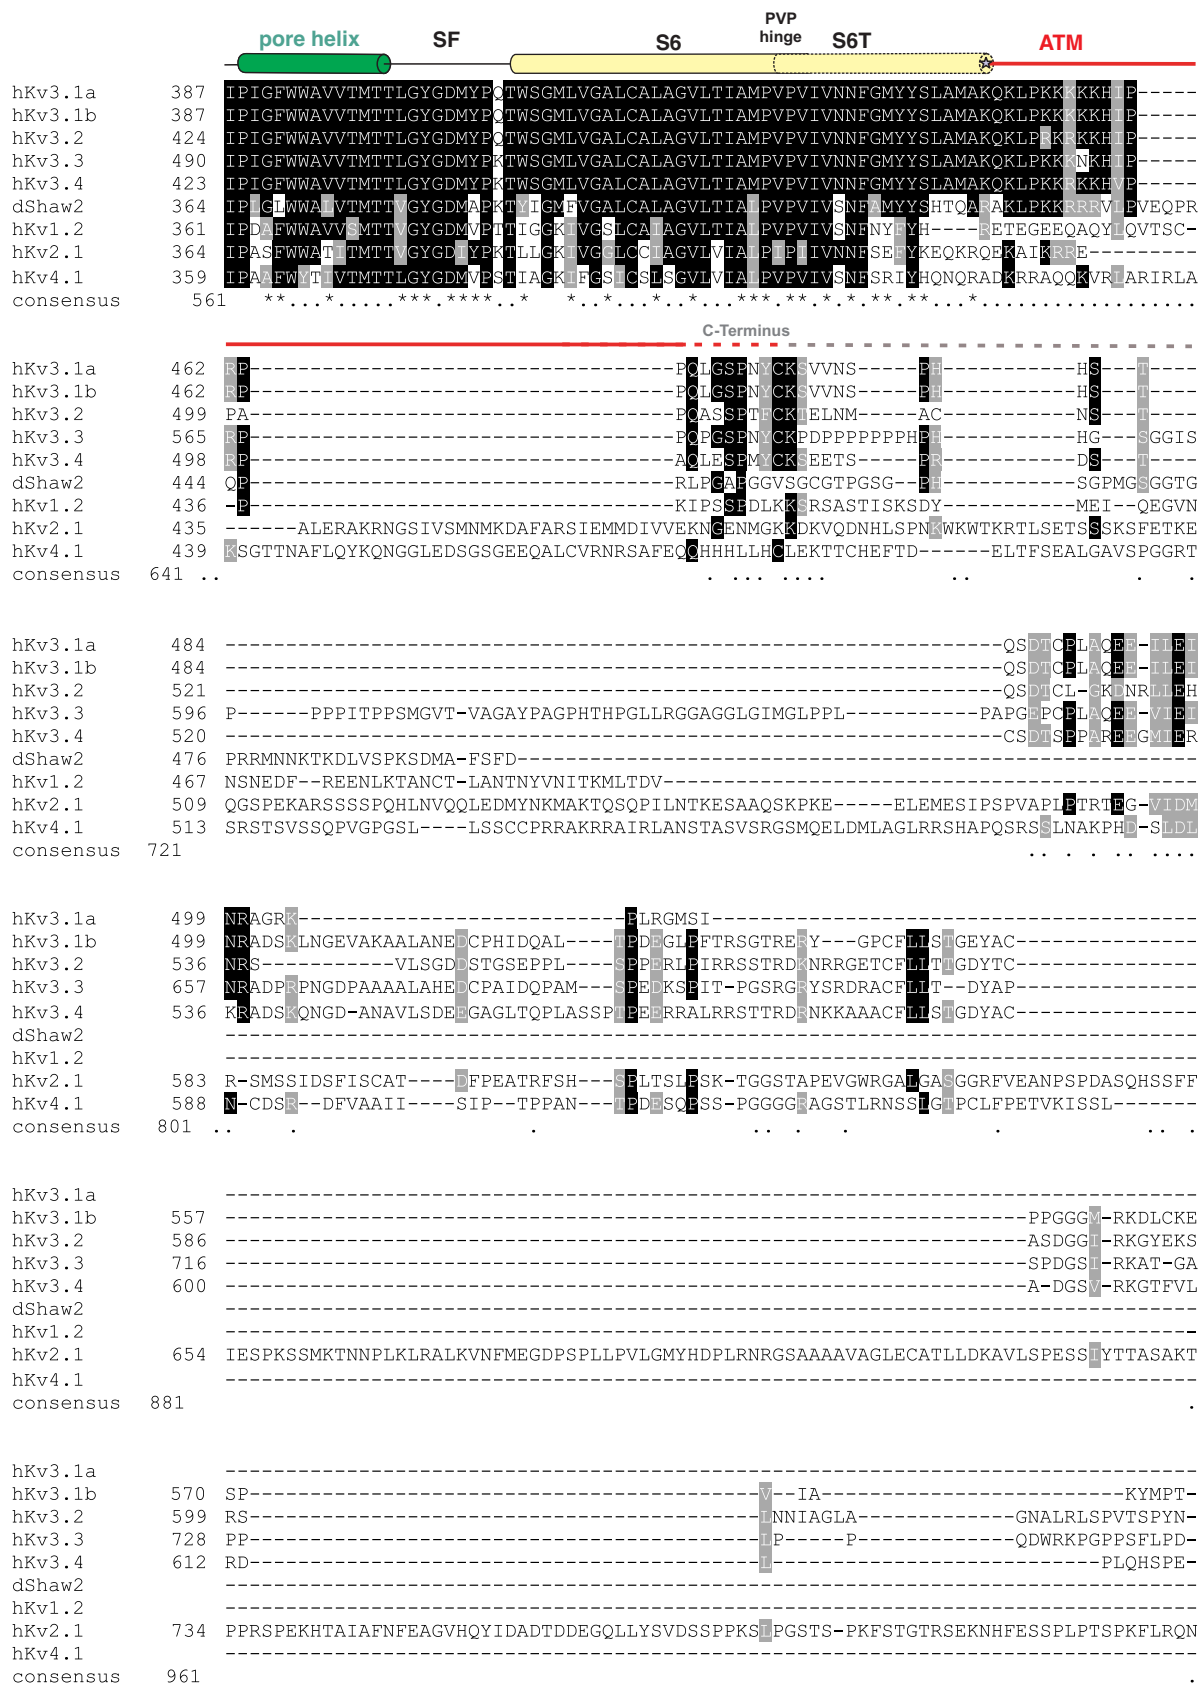



|                                             | KCNC1 (Apo)                | KCNC1 with EDTA            |            |            | KCNC1 with ZnCl <sub>2</sub> |           |
|---------------------------------------------|----------------------------|----------------------------|------------|------------|------------------------------|-----------|
| <b>Data collection</b>                      |                            |                            |            |            |                              |           |
| Microscope                                  | Titan Krios (MRCEF, UK)    | Titan Krios (CNC, UK)      |            |            | Titan Krios, (ESRF, UK)      |           |
| Detector                                    | K3                         | K3                         |            |            | K3                           |           |
| Voltage (kV)                                | 300                        | 300                        |            |            | 300                          |           |
| Magnification                               | 105,000                    | 105,000                    |            |            | 105,000                      |           |
| Collection mode                             | Counting (superresolution) | Counting (superresolution) |            |            | Counting (superresolution)   |           |
| Electron exposure (e/Å <sup>2</sup> )       | 40                         | 47.6                       |            |            | 47.6                         |           |
| Number of frames                            | 45                         | 40                         |            |            | 40                           |           |
| Pixel size                                  | 0.42                       | 0.42                       |            |            | 0.42                         |           |
| Defocus range (µm; steps)                   | -1.0 to -2.6 (0.2)         | -0.6 to -2.4 (0.2)         |            |            | -0.6 to -2.4 (0.2)           |           |
| Number of movies                            | 4,043                      | 7,274                      |            |            | 5,010                        |           |
| Phase plate used                            | No                         | No                         |            |            | No                           |           |
| <b>Data processing</b>                      |                            |                            |            |            |                              |           |
|                                             |                            | Consensus                  | Subclass 1 | Subclass 2 | Monomer                      | Dimer     |
| Initial Number of particles                 | 1,539,146                  | 3,177,434                  |            |            | 2,672,854                    |           |
| Number of particles after 2D classification | 58,244                     | 217,788                    |            |            | 263,026                      |           |
| Symmetry                                    | C4                         | C4                         | C1         | C1         | C4                           | C4        |
| Number of particles used for 3D refinement  | 49,327                     | 217,788                    | 110,585    | 93,461     | 133,488                      | 72,764    |
| Map resolution (Å; FSC threshold = 0.143)   | 3.2                        | 3.2                        | 3.6        | 3.6        | 3.1                          | 3.1       |
| Resolution range (Å)                        | 2.7 – 9.3                  | 2.6 – 6.4                  | 3.0 – 8.7  | 3.5 – 8.4  | 2.7 – 8.0                    | 2.6 – 9.5 |
| Map sharpening B-factor (Å <sup>2</sup> )   | -134.4                     | -164.3                     | -135.0     | -102       | -153.2                       | -108.4    |
| <b>Refinement</b>                           |                            |                            |            |            |                              |           |
| Model resolution (Å; FSC threshold = 0.5)   | 3.5                        | 3.4                        |            |            | 3.4                          | 3.3       |
| <b>Model composition</b>                    |                            |                            |            |            |                              |           |
| Non-hydrogen atoms                          | 12,720                     | 12,604                     |            |            | 12,708                       | 25,404    |
| Protein residues                            | 1584                       | 1564                       |            |            | 1,572                        | 3140      |
| Ligands                                     | 16                         | 16                         |            |            | 16                           | 32        |
| <b>R.M.S.D</b>                              |                            |                            |            |            |                              |           |
| Bond lengths (Å)                            | 0.007                      | 0.007                      |            |            | 0.003                        | 0.004     |
| Bond angles (°)                             | 0.700                      | 0.672                      |            |            | 0.494                        | 0.530     |
| <b>Validation</b>                           |                            |                            |            |            |                              |           |
| Molprobit score                             | 1.61                       | 1.57                       |            |            | 1.64                         | 1.70      |
| Clash score                                 | 7.68                       | 6.46                       |            |            | 7.79                         | 5.89      |
| Rotamer outliers                            | 0.96                       | 0.96                       |            |            | 0.00                         | 2.53      |
| <b>Ramachandran plot</b>                    |                            |                            |            |            |                              |           |
| Favoured (%)                                | 0.00                       | 0.00                       |            |            | 0.00                         | 0.00      |
| Allowed (%)                                 | 3.09                       | 3.33                       |            |            | 3.38                         | 2.34      |
| Disallowed (%)                              | 96.91                      | 96.67                      |            |            | 96.62                        | 97.66     |
| <b>EMDB Code</b>                            |                            |                            |            |            |                              |           |
|                                             | EMD-13416                  | EMD-13419                  |            |            | EMD-13417                    | EMD-13418 |
| <b>PDB Code</b>                             |                            |                            |            |            |                              |           |
|                                             | 7PHH                       | 7PHL                       |            |            | 7PHI                         | 7PHK      |

**Supplemental Table 1. Cryo-EM data collection and processing parameters and model refinement statistics for Kv3.1a datasets collected under apo, Zn<sup>2+</sup>-free and Zn<sup>2+</sup>-containing conditions.**

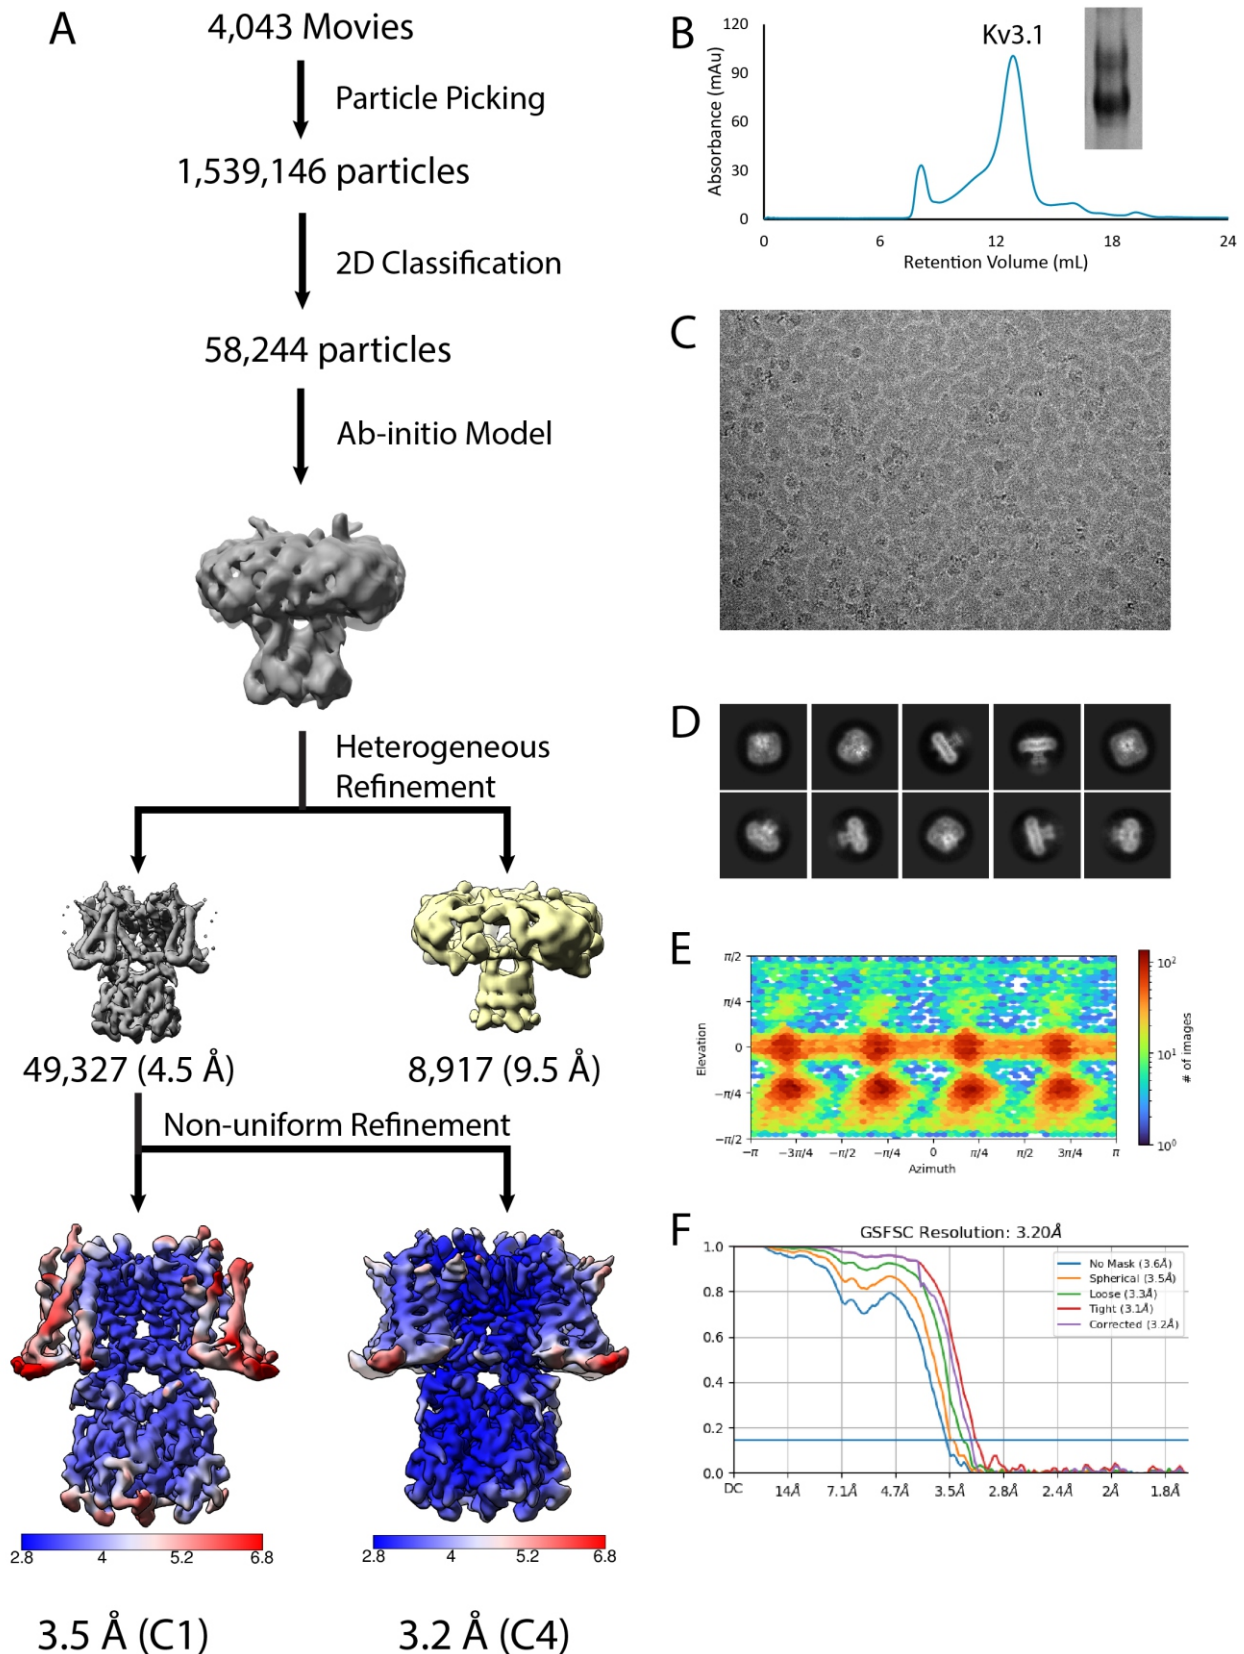

**Supplemental Figure S2. Purification and cryo-EM analysis of Kv3.1a under apo conditions.**

(A) Flowchart for EM data processing and maps for color-coded local resolution estimation after processing with C1 and C4 symmetry, respectively.

(B) A representative size-exclusion chromatography profile and characteristic band pattern on SDS PAGE. Multiple bands are due to complex N-linked glycosylation at N220 and N229.

(C) A representative electron micrograph illustrating particle distribution of Kv3.1a.

(D) Representative 2-dimensional class averages from the electron micrographs.

(E) Angular distribution of particles included in the final reconstructions.

(F) FSC curves of the refined model for processing with different masks.

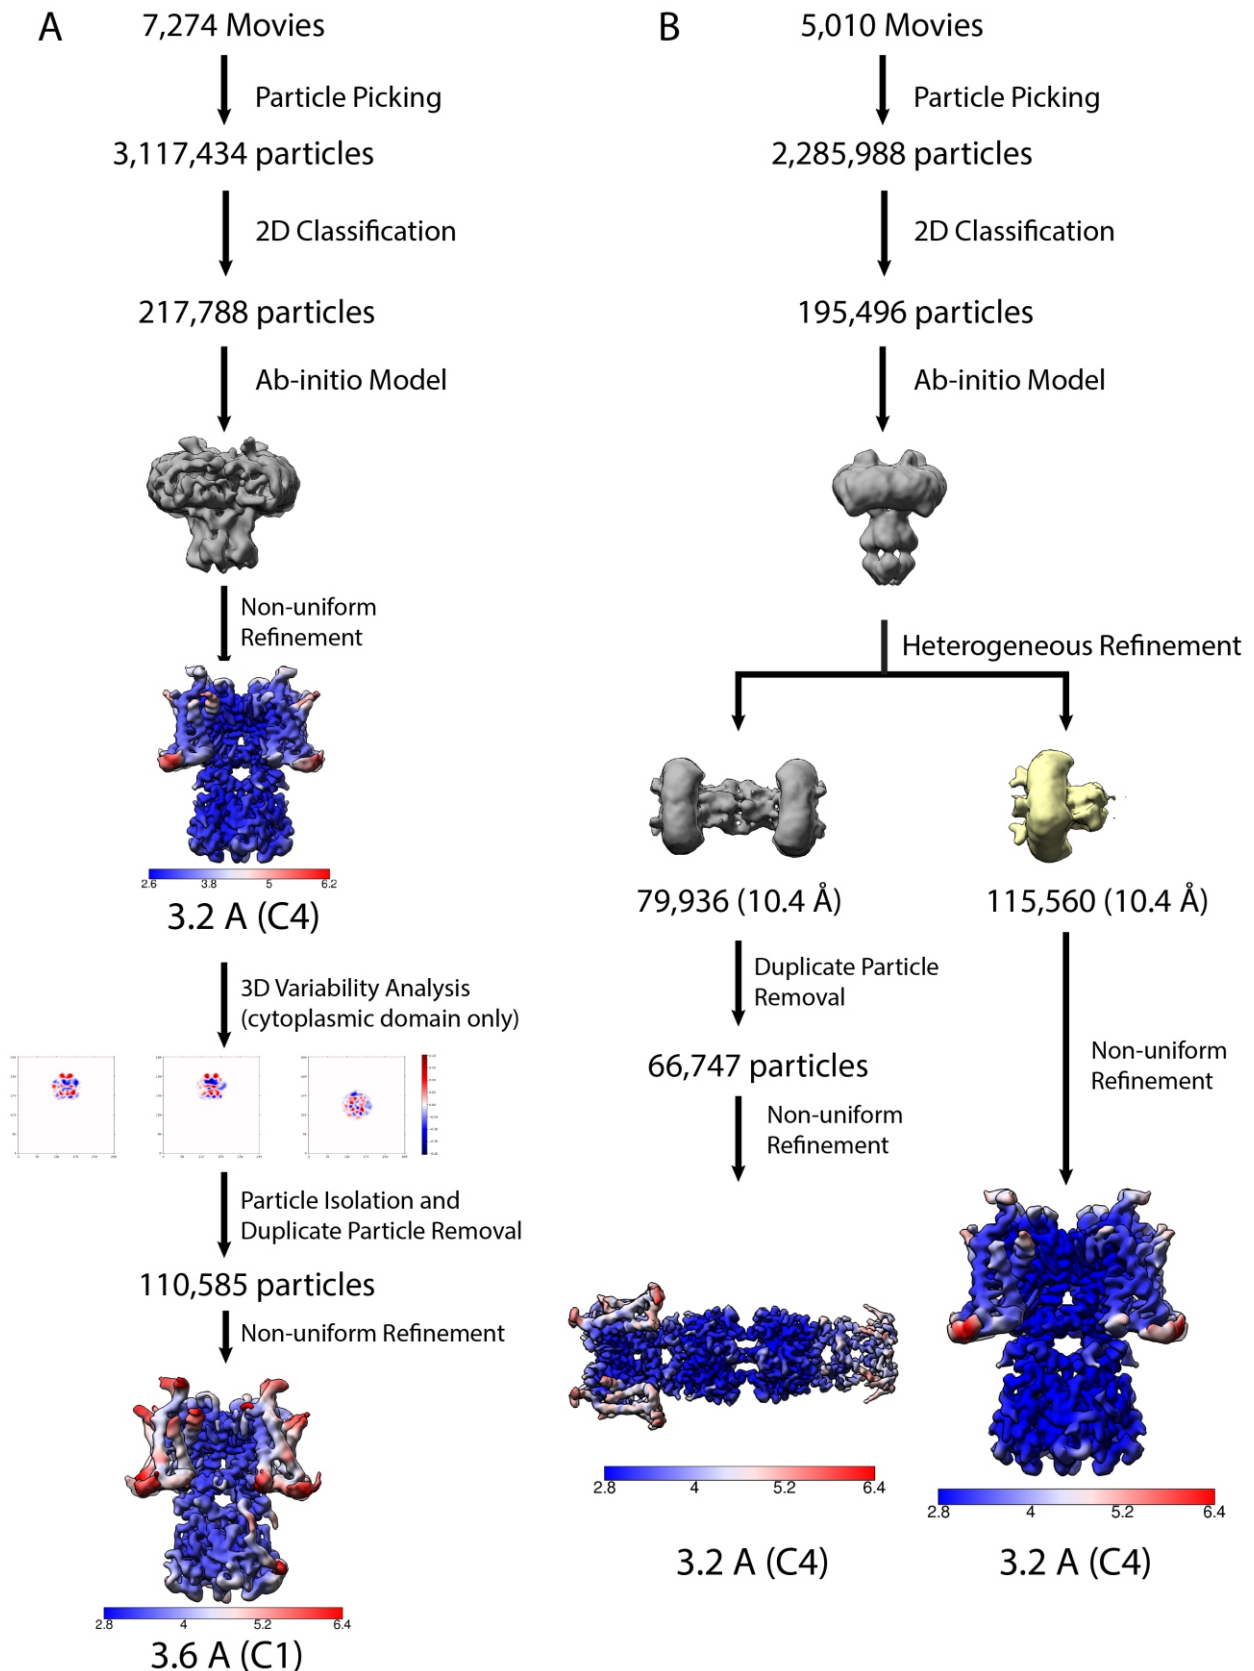

**Supplemental Figure S3. Cryo-EM data processing of Kv3.1a in presence of EDTA or ZnCl<sub>2</sub>.**

(A) Flowchart for EM data processing including 3D variability analysis and maps for color-coded local resolution estimation after processing with C1 and C4 symmetry for a dataset obtained in presence of 1 mM EDTA.

(B) Flowchart for EM data processing and maps for color-coded local resolution estimation after processing with C4 symmetry for a dataset collected in presence of 400 μM ZnCl<sub>2</sub>.



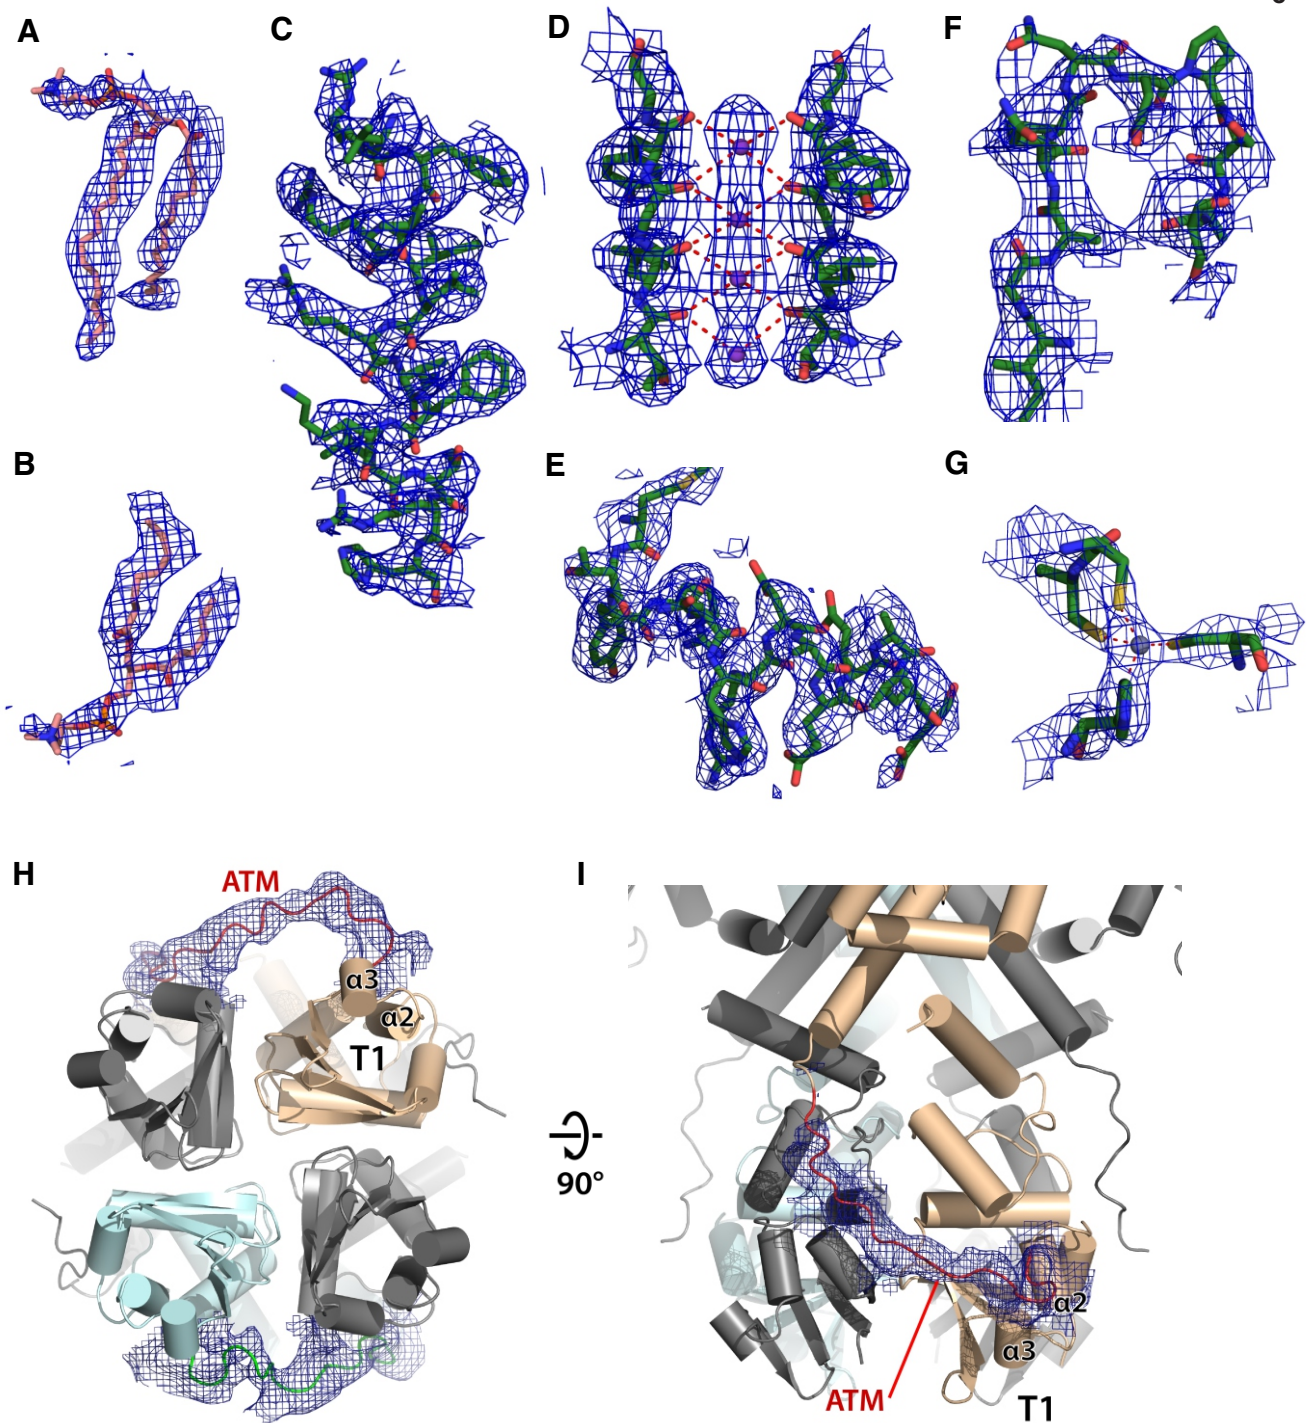

**Supplemental Figure S4. EM density maps for representative segments in the Kv3.1a channel.**

(A) EM density map for the lipid at site II (near PH helix/ turret)

(B) EM density map for the lipid at site I (near S4 and S4/S5L)

(C) EM density map for the S4 helix in the voltage-sensing domain (VSD)

(D) EM density map for the selectivity filter with coordinated K<sup>+</sup> ions

(E) EM density maps for the α6 helix in the cytoplasmic T1 domain

(F) EM density maps for the turret domain

(G) EM density maps for the Zn<sup>2+</sup> binding motif in the T1 domain

(H-I) EM density maps for the axonal targeting motif (ATM) and C-terminal extension for a particle subclass showing extra densities for two chains of the tetramer.

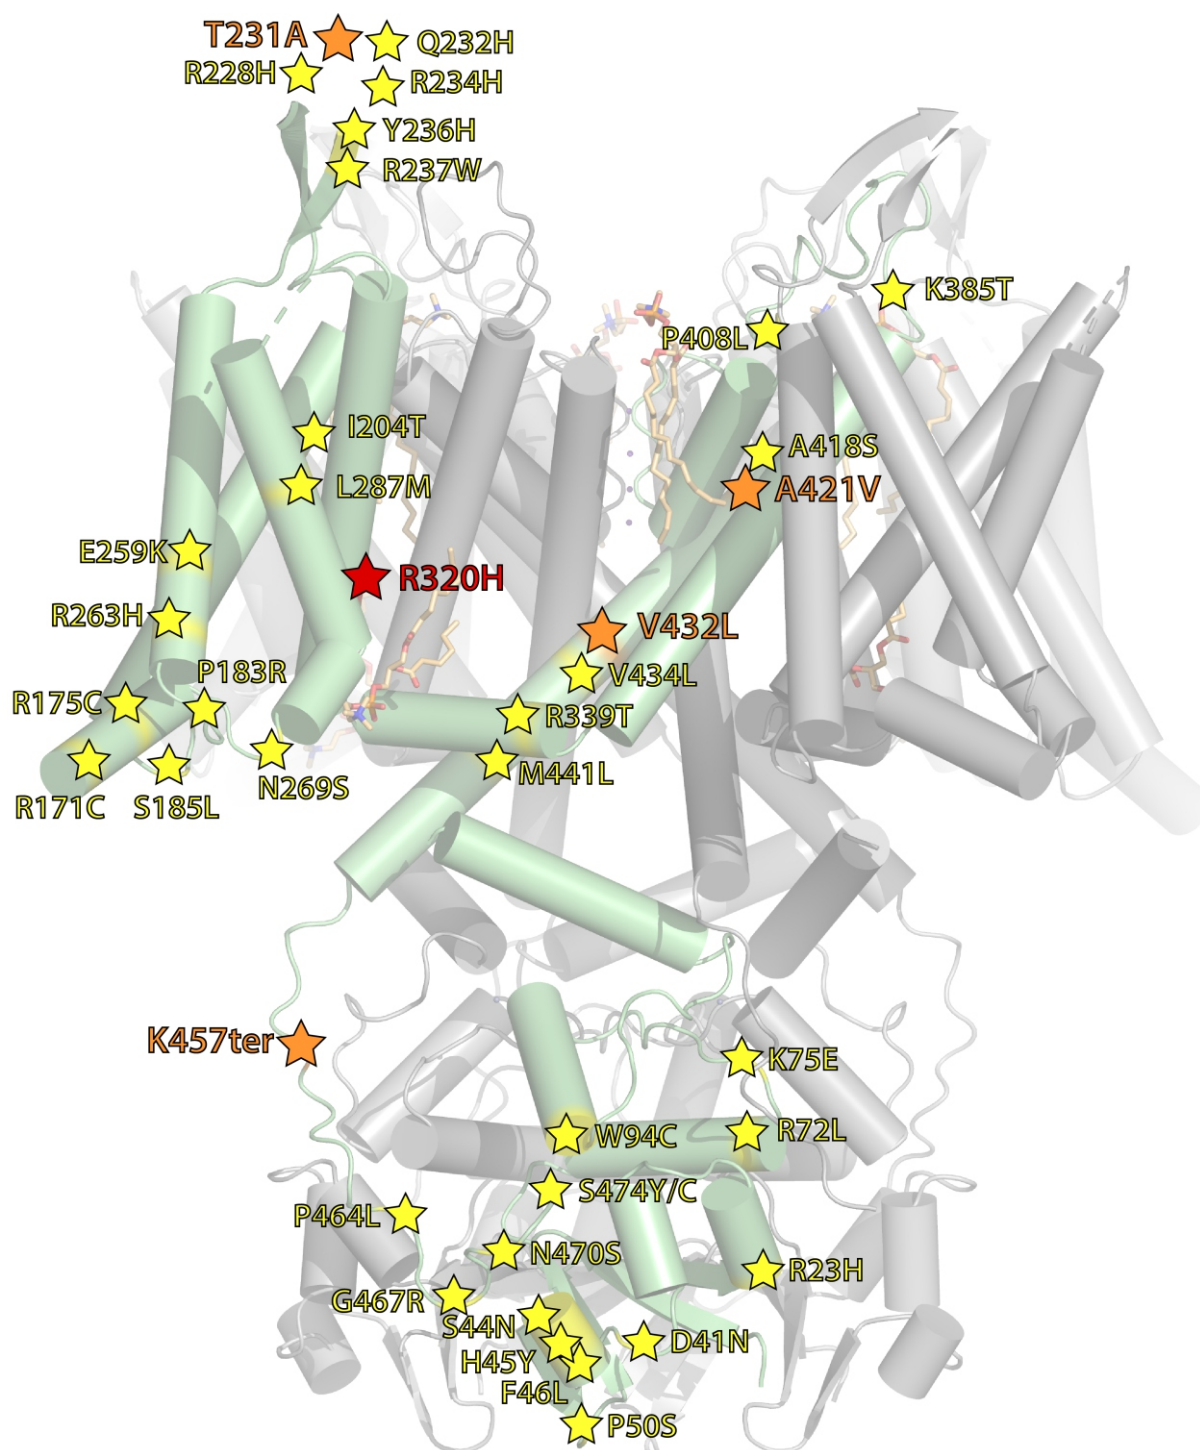

**Supplemental Figure S5. Detailed mapping of disease mutations in the human *KCNC1* gene linked to EPM7 and related epileptic encephalopathies.**

Variants of the human *KCNC1* gene associated with the autosomal dominant disorder EPM7 (progressive myoclonic epilepsy-7) listed at [www.malacards.org](http://www.malacards.org) were mapped onto the structure of the Kv3.1a tetramer, represented as grey cartoon. A single protomer is coloured in light green to highlight mutations located at intersubunit interfaces. Red star symbols indicate mutations which have been characterized extensively in the literature and the epileptic phenotype of the variant has been confirmed. Mutations labeled with orange star symbols are annotated to be "likely pathogenic". Yellow star symbols indicate amino acid positions of mutations with "uncertain significance" according to the variant database.



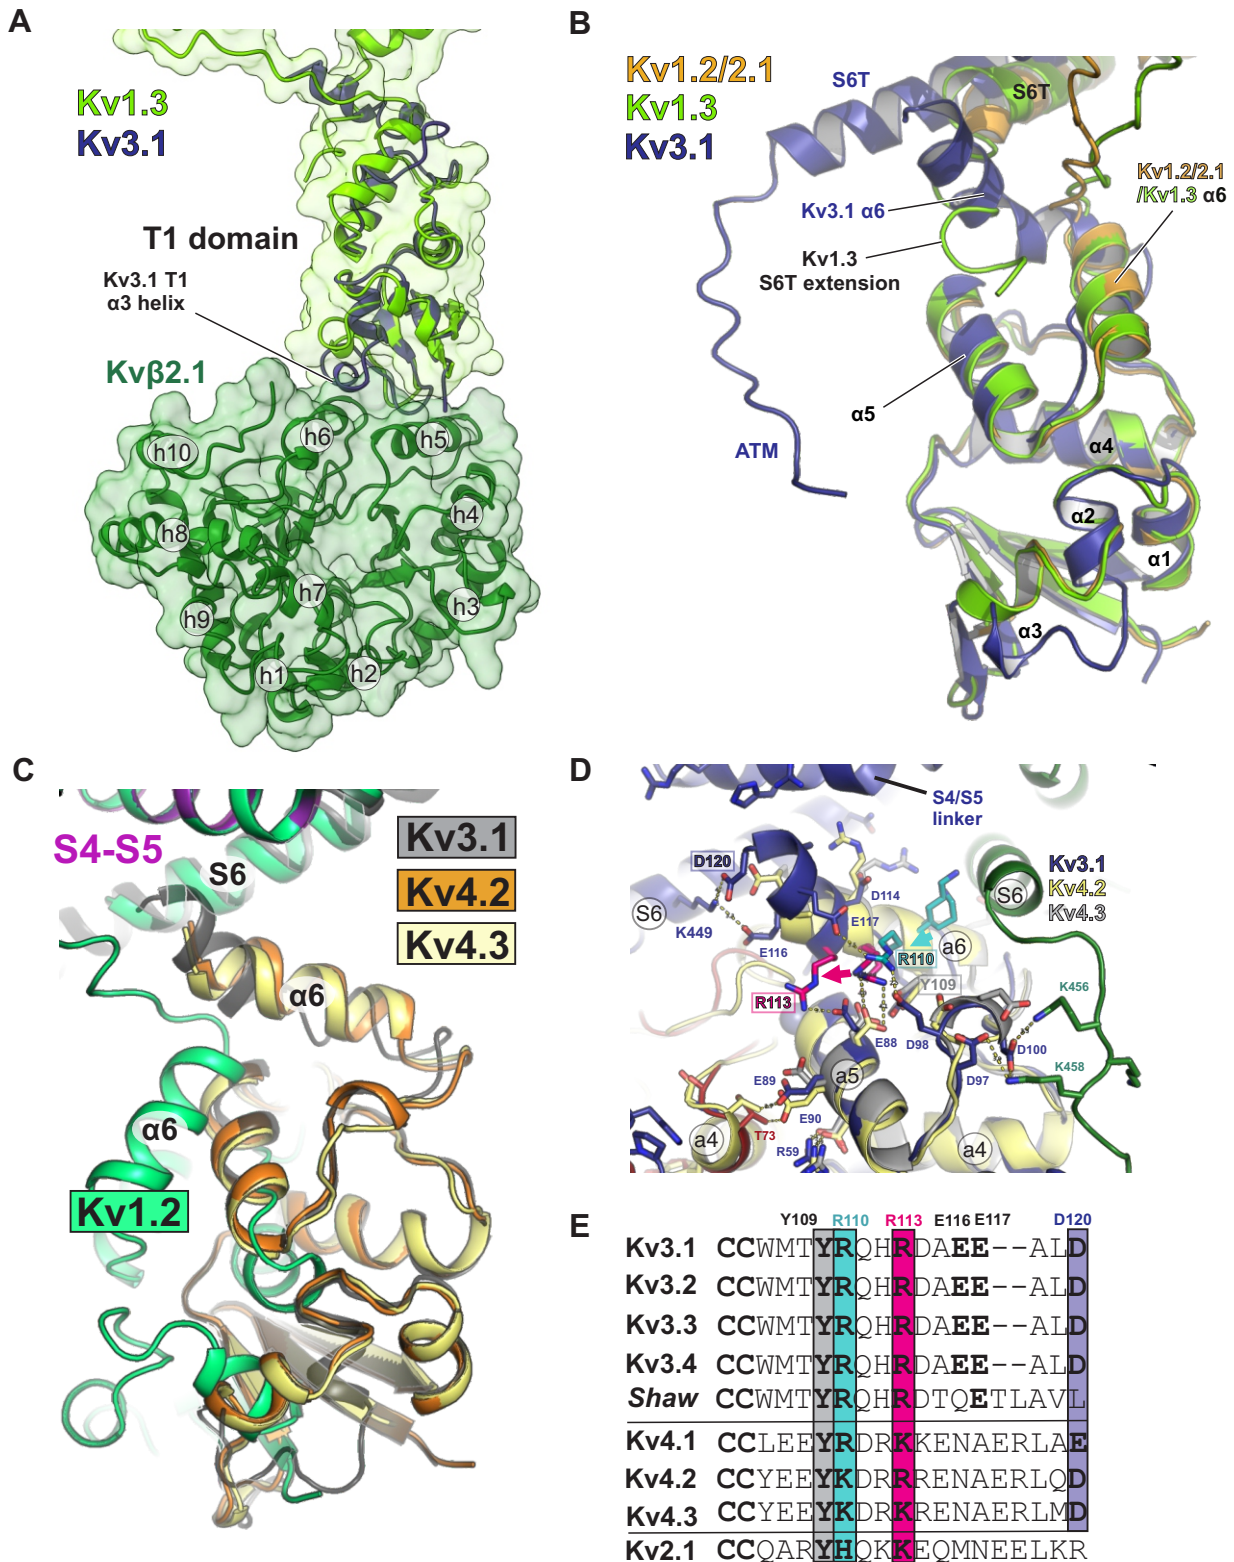

**Supplemental Figure S6. Comparison of the T1 domain structure in Kv3.1a with T1 domains of representative members from the Kv1 and Kv4 subfamilies**

(A) Superposition of the T1 domain from the Kv3.1a structure in presence of Zn (dark blue) with the T1 domain from the Kv1.3/β2.1 structure (green, pdb: 7EJ1), highlighting a clash of the Kv3.1 α3 helix with helix h6 of the β-subunit.

(B) Superposition of the T1 domain of Kv3.1a (dark blue) with the T1 domains of Kv1.2-2.1 (yellow, pdb: 6EBK) and Kv1.3 (green, pdb: 7EJ1) showing how S6T extensions in Kv1.3 would clash with an α6 helical arrangement similar to Kv3.1a.

(C) Superposition of the T1 domains of Kv3.1a (grey) with the T1 domain of Kv1.2-2.1 (green, pdb: 6EBK) and the structures of the isolated T1 domains from Kv4.2 (orange, pdb: 1NN7) and Kv4.3 (yellow, pdb: 1S1G).

(D) close-up view of the α6 helix of Kv3.1 (dark blue) superposed with T1 structures of Kv4.2 (yellow, pdb: 1NN7) and Kv4.3 (grey, pdb: 1S1G)

A

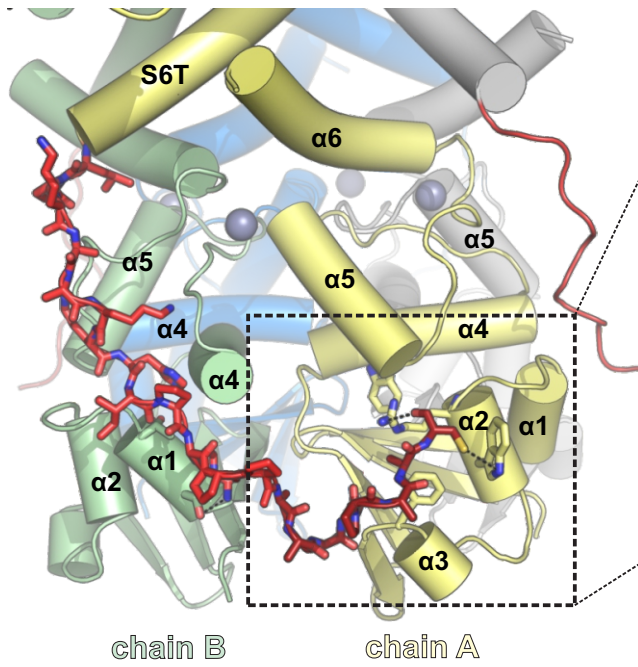

B

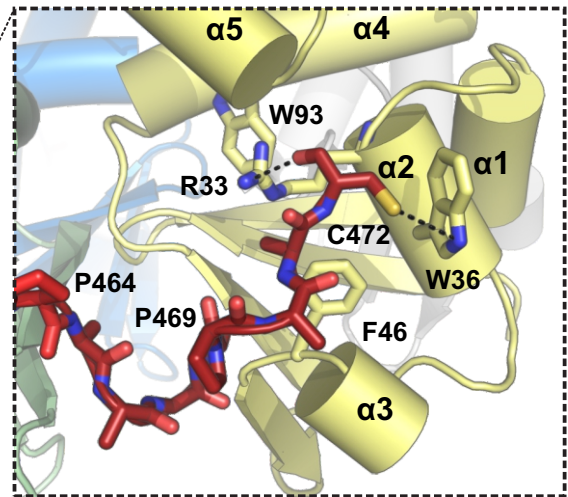

11

**Supplemental Figure S7. C-terminal extension beyond the axonal targeting motif (ATM) interacts with two neighboring chains of the T1 domain.**

(A) Close-up view of the T1 domain from the Kv3.1a with chains from different subunits shown as green, yellow, blue and grey cartoon. Residues 452-472 of the C-terminus from chain A are shown in stick representation. Residues 452-463 shown in bright red and residues 464-472 shown in dark red.

(B) Inset from A, showing intra-subunit interactions between residues of the C-terminal extension (residues 464-472, shown in dark red) and residues in the  $\alpha 2$  and  $\alpha 3$  helices (yellow cartoon) of the T1 domain.



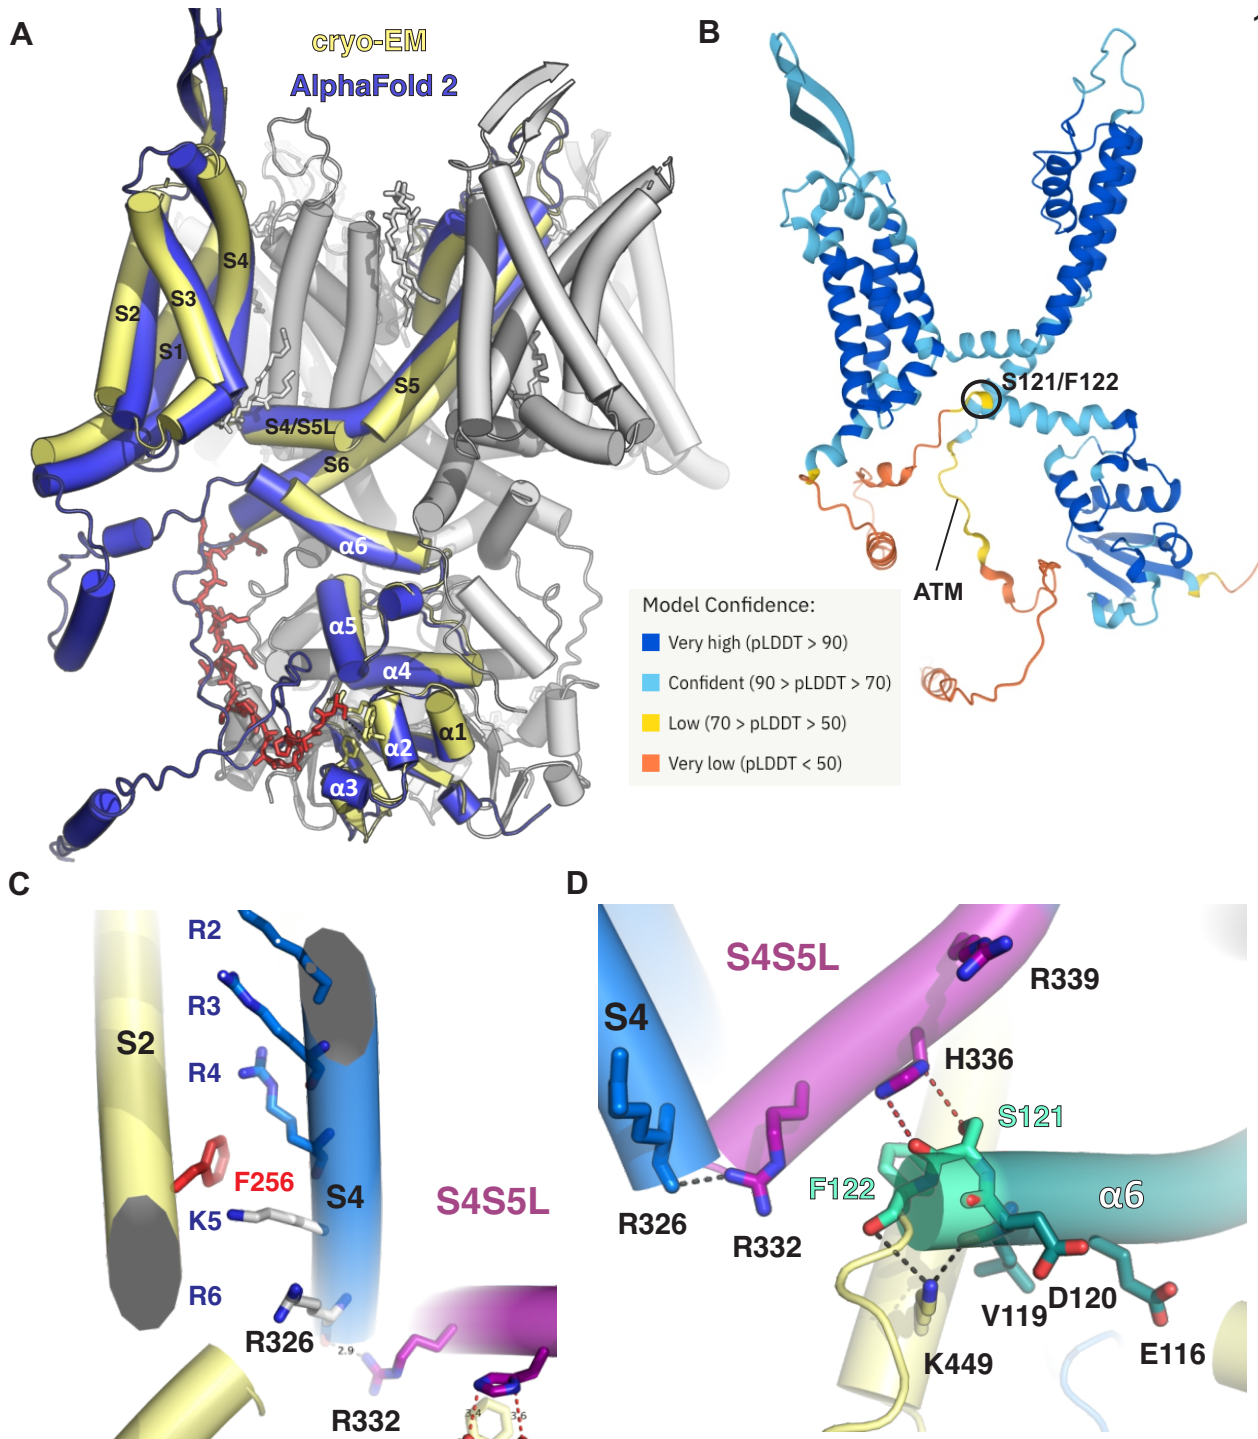

**Supplemental Figure S8. Comparison of the Kv3.1a cryo-EM structure to model predicted by AlphaFold2 shows differences in the arrangement of S4 and the S4/S5 linker.**

(A) Superposition of the protomer structure of human Kv3.1a predicted by AlphaFold2 (blue cartoon, taken from: [alphafold.ebi.ac.uk/entry/P48547](https://alphafold.ebi.ac.uk/entry/P48547)) onto 1 chain from the cryo-EM structure of Kv3.1a (yellow cartoon). The rest of the Kv3.1a tetramer is represented as grey cartoon.

(B) AlphaFold2 model for one protomer of Kv3.1a colored by level of confidence.

(C) Close-up showing the arrangement of the voltage-sensing S4 helix with positions of gating charges R2-R6 with respect to F356 of the CTC predicted by AlphaFold2. Compared to the experimentally determined cryo-EM structure, S4 is in a more upward-shifted position, with R4 located above F256 in the S1 segment.

(D) Close-up view of the S4/S5 linker region in the AlphaFold2 model, highlighting interactions to residues in S4 and  $\alpha 6$  of the T1 domain. The model predicts a helical extension of two amino acids (S121 and F122) beyond the experimentally determined model. In this arrangement, the side chain of H336 interacts with the hydroxyl and backbone carbonyl groups of S121. K449 in S6T also interacts with a different set of residues (backbone carbonyls of V119 and G123). This moves the closest point of contact between S4/S5L and  $\alpha 6$  in T1 closer to S4 (between R332 and H336), whereas this interdomain interaction is closer to S5 according to the cryo-EM structure (between H336 and R339, see main Figure 3 C). The R226/R332 H-bond between S4 and S4/S5 linker is present in the AI-predicted and the experimentally determined model.

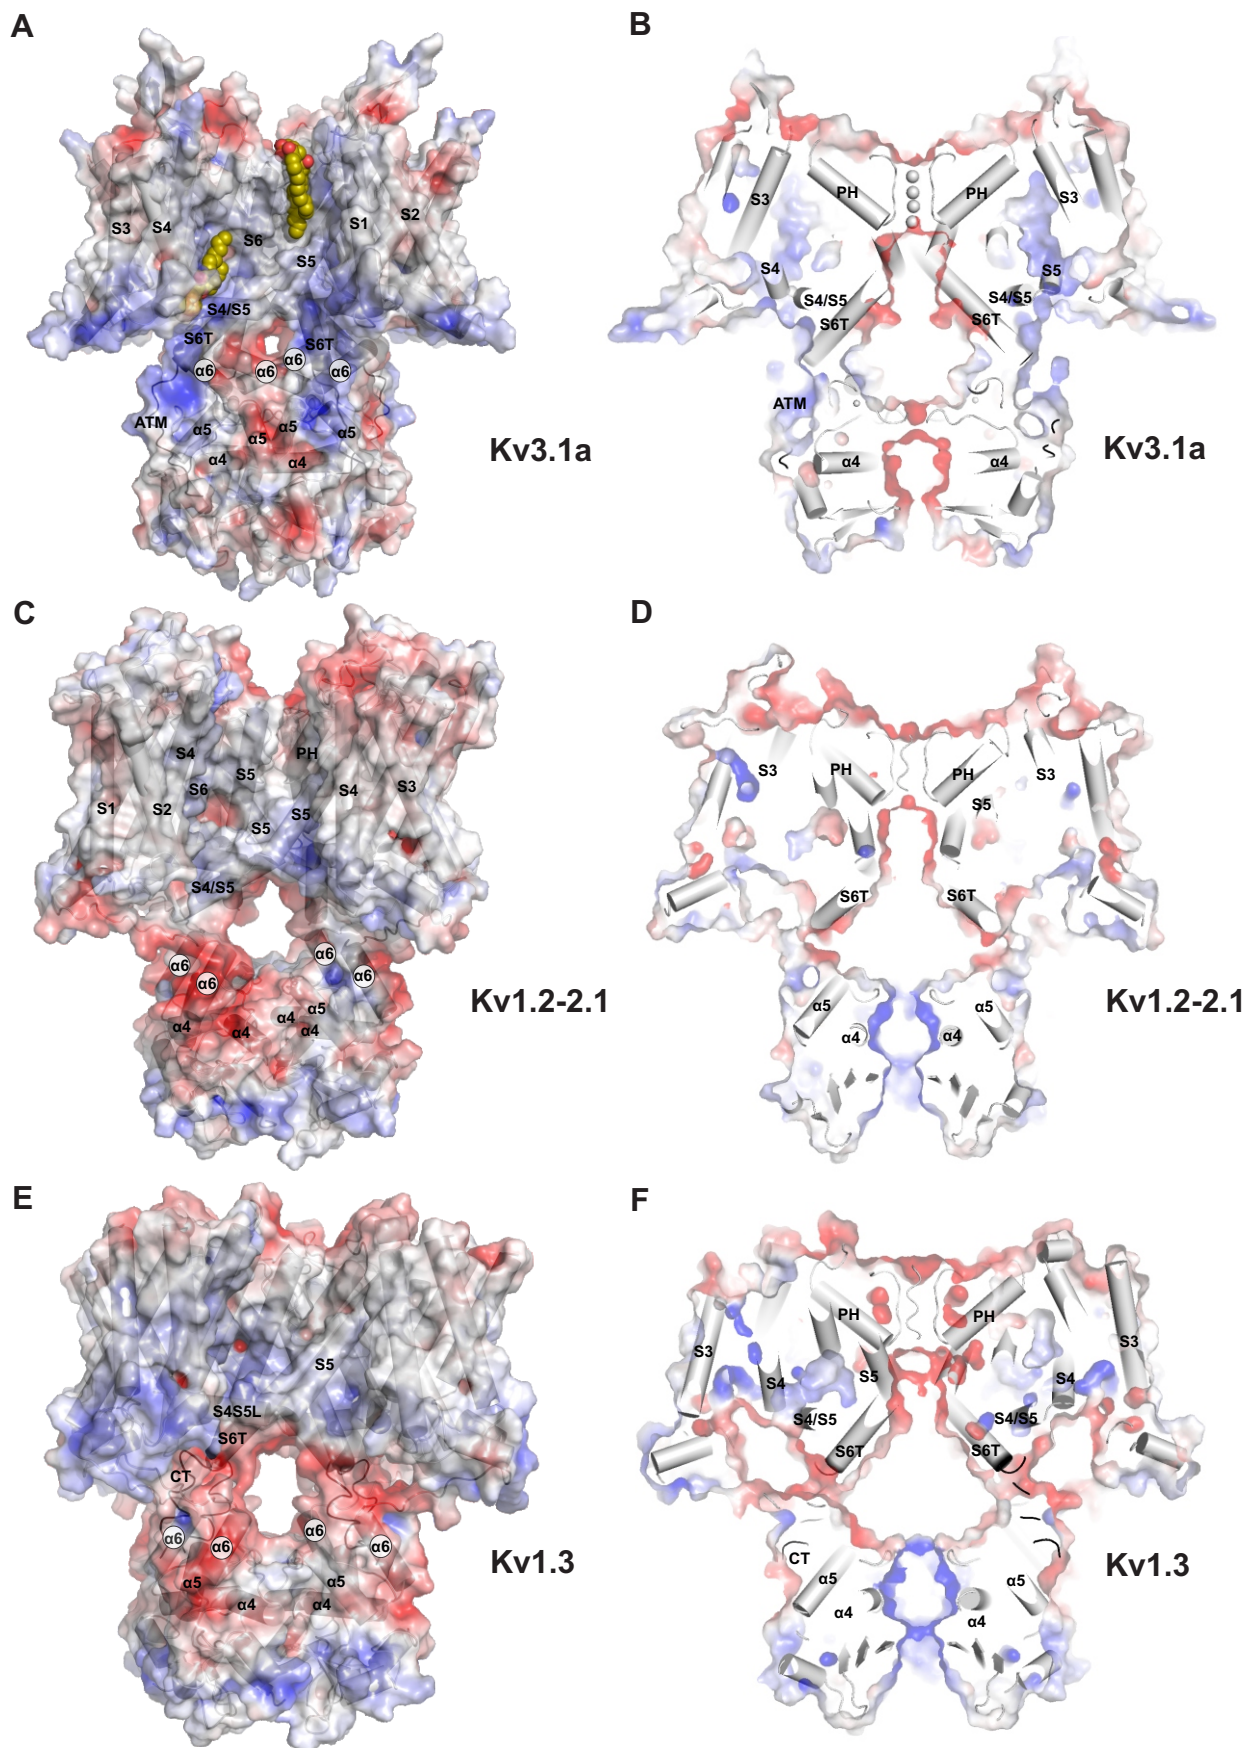

**Supplemental Figure S9. Comparison of electrostatic surface potential distribution for human Kv channel structures of Kv3.1a, Kv1.2-2.1 and Kv1.3.**

(A, B) Surface representation of human Kv3.1a in front view (A) and cross-sectional view (B).

(C, D) Surface representation of human Kv1.2-2.1 (pdb:6EBK) in front view (C) and cross-sectional view (D).

(E, F) Surface representation of human Kv1.3 in front view (E) and cross-sectional view (F).

Surfaces are coloured by electrostatic potential (red,  $-5 \text{ kT e}^{-1}$ ; blue,  $+5 \text{ kT e}^{-1}$ ).



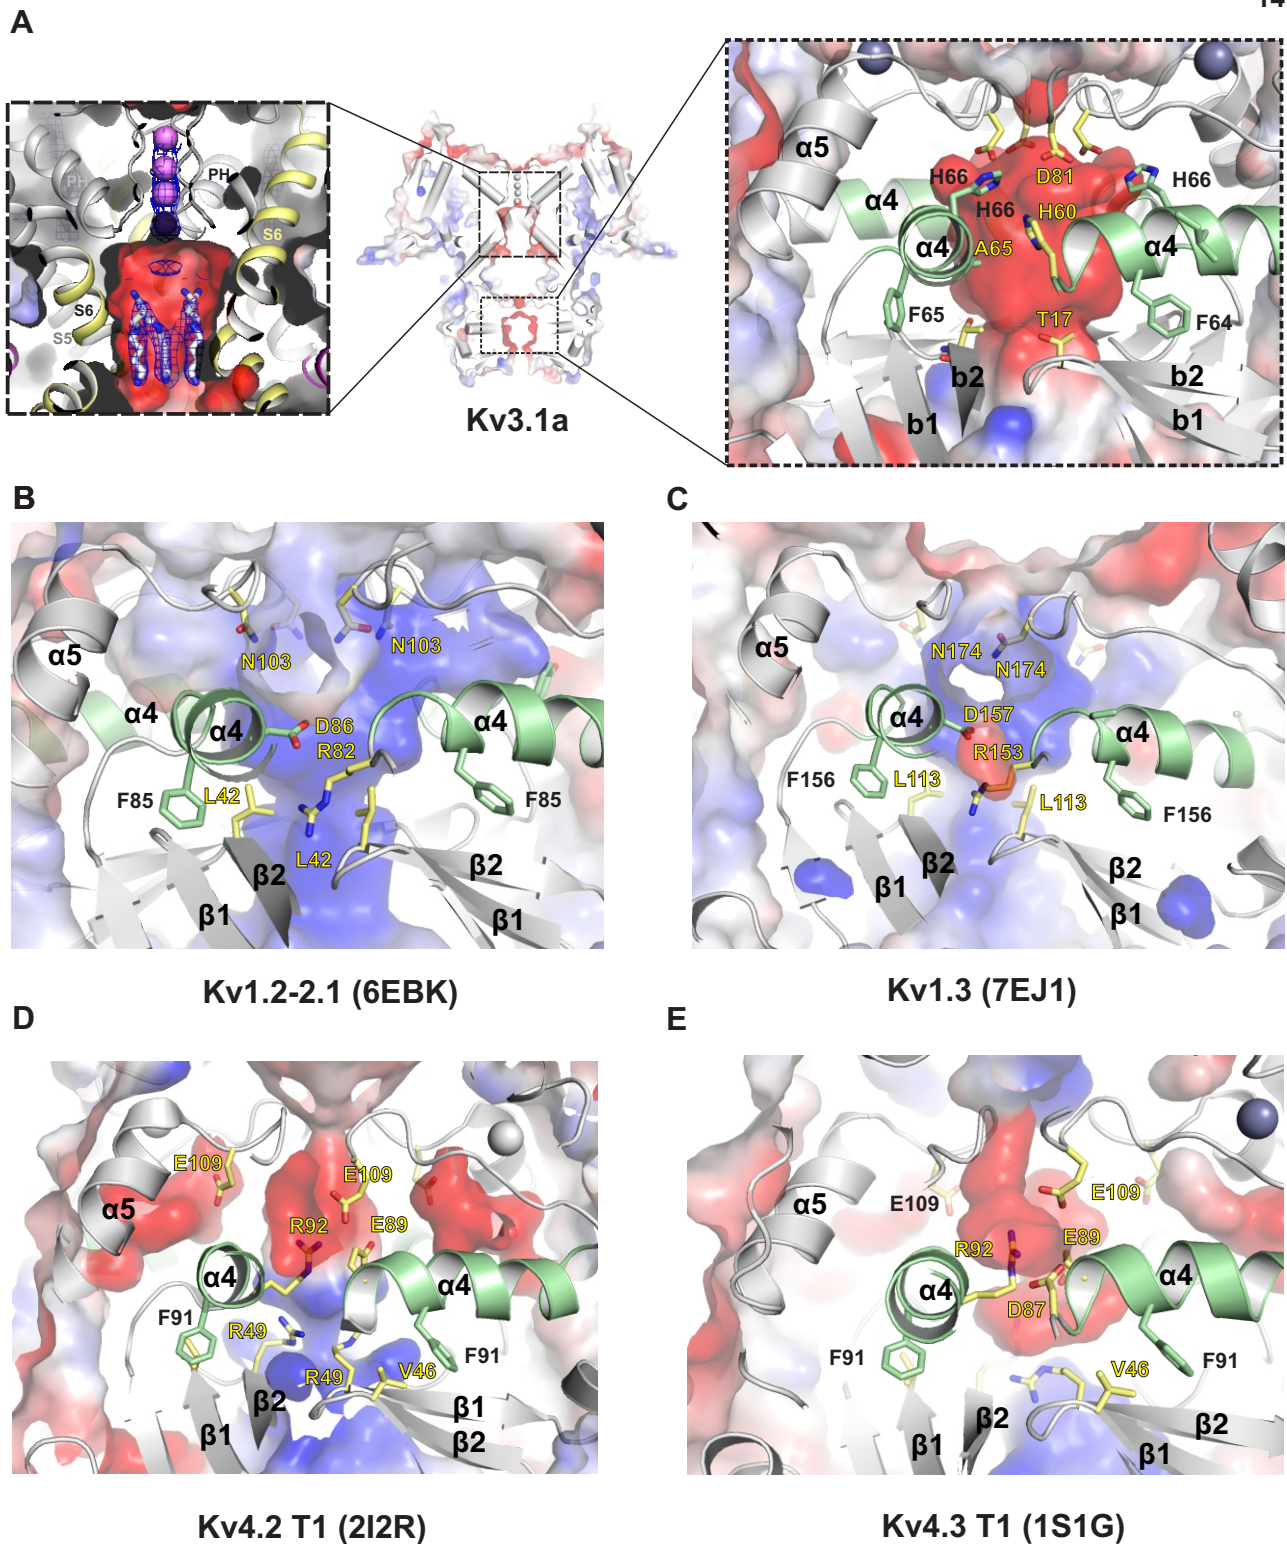

**Supplemental Figure S10. Comparison of electrostatic surface charges near  $\alpha 4$  in T1 of Kv3.1a and T1 domains from other representative channels of the Kv1 and Kv4 subfamilies.**

(A) Slab view of the full length Kv3.1a structure in electrostatic surface representation. Left inset: Close-up view of the upper vestibule near the selectivity filter (SF). Densities for  $K^+$  ions (purple spheres) in the SF and densities for unidentified small molecule(s) are shown as blue mesh.

Right inset: close-up view of the lower vestibule in T1 near helix  $\alpha 4$ , highlighting position of D81.

(B) Close-up view of the lower vestibule in T1 near helix  $\alpha 4$  for the rat Kv1.2-2.1 structure (pdb 6EBK).

(C) Close-up view of the lower vestibule near  $\alpha 4$  for the human Kv4.2 T1 structure (pdb 2I2R).

(D) Close-up view of the lower vestibule near  $\alpha 4$  for the human Kv4.3 T1 structure (pdb 1S1G).

Surfaces are coloured by electrostatic potential (red,  $-5 \text{ kT e}^{-1}$ ; blue,  $+5 \text{ kT e}^{-1}$ ).

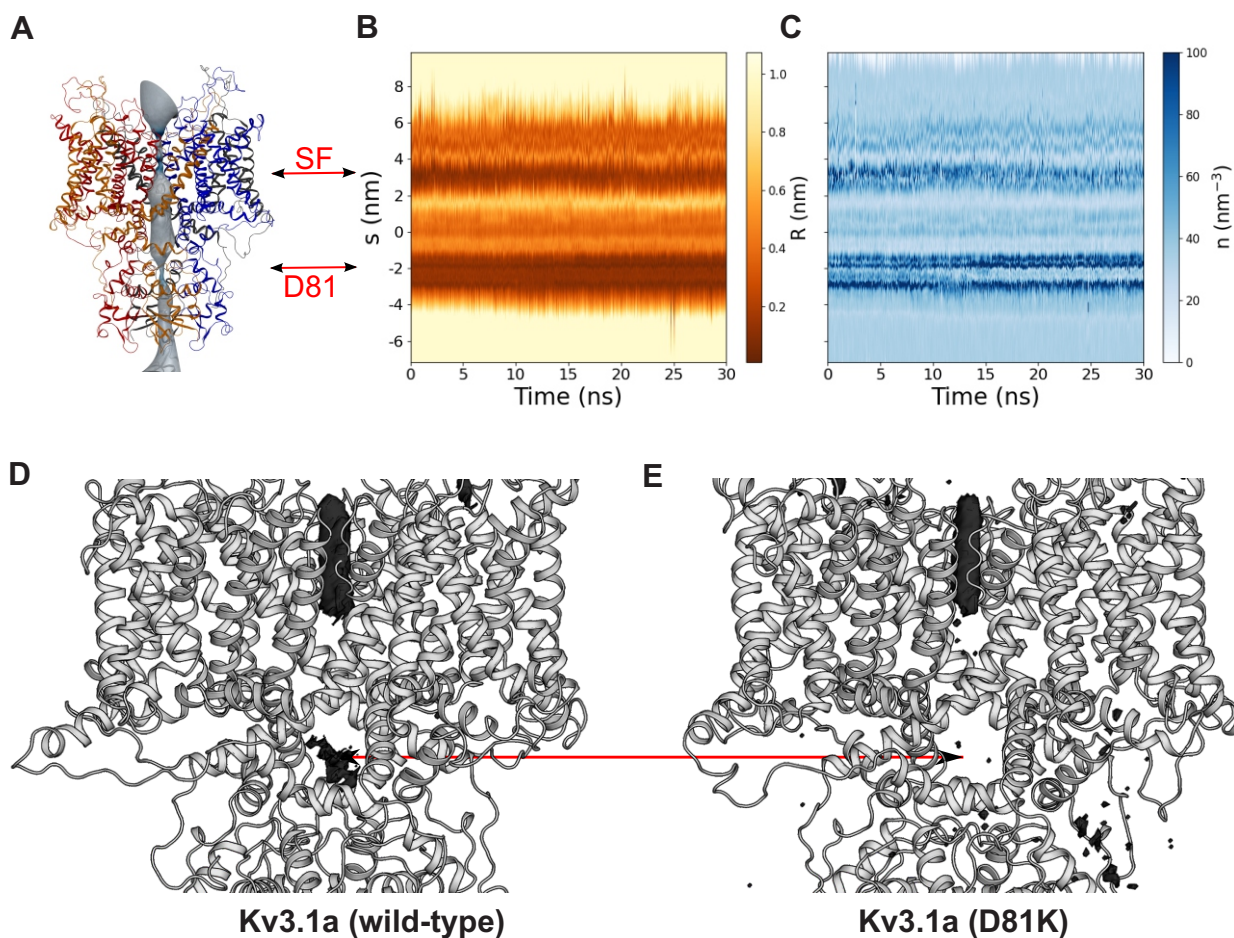

**Supplemental Figure S11. Pore hydration properties and role of D81 (T1 domain) for increasing  $\text{K}^+$  occupancy at the interstitial spaces between subunits.**

**(A)** Water density within the Kv3.1a channel calculated from unbiased MD simulations. The constriction site in the T1 domain at D81 is indicated by the red arrow symbol.

**(B, C)** Evolution of the pore radius in nm (B) and water density in  $\text{nm}^3$  within the Kv3.1a pore (C) over simulation time (in nsec), showing that the pore region near the PVP hinge remains hydrated throughout the simulation.

**(D, E)**  $\text{K}^+$  occupancy densities in simulations of wild-type (D) and D81K (E) mutant, illustrated at an isosurface value of 0.2 molecules/ $\text{nm}^3$ . The interstitial void occupancy by  $\text{K}^+$  ions (indicated by the red arrow) is disrupted by the charge-inverting D81K mutation. The difference in abundance is seen in MD simulations at 0 mV and -300 mV.



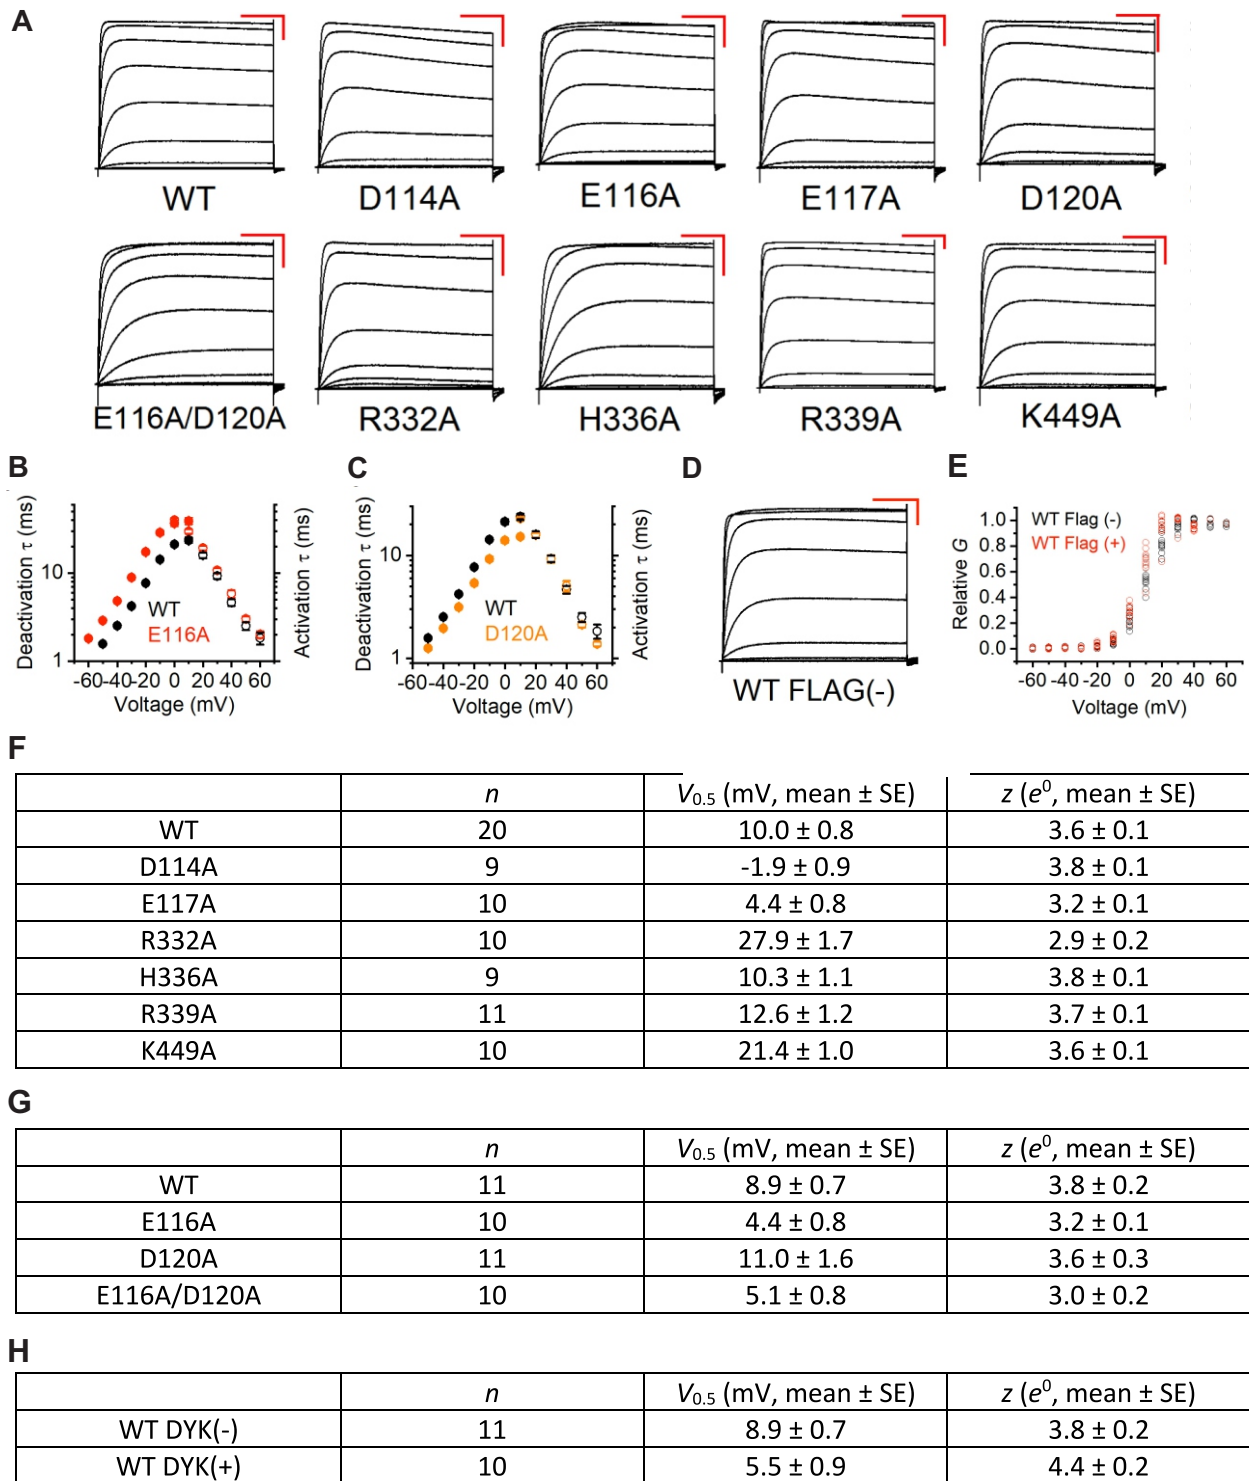

**Supplemental Figure S12. TEVC recordings of Kv3.1a channels in *Xenopus* oocytes.**

**(A)** Representative whole-oocyte currents of Kv3.1a wild type (WT) and several alanine mutants. Currents are evoked by 400-ms step depolarizations from a holding voltage of  $-100$  mV. The steps are delivered in increments of 10 mV from  $-60$  mV to 50 mV (to 60 mV for R332A and K449A), and the start-to-start interval is 5 s. The horizontal and vertical scale bars indicate 100 ms and 1  $\mu$ A, respectively.

**(B, C)** The voltage dependence of the time constants of activation (hollow symbols) and deactivation (filled symbols) from Kv3.1a WT, E116A (**B**) and D120A (**C**). Symbols and error bars represent the mean  $\pm$  SEM. Error bars are smaller than the symbol size.

**(D)** Representative whole-oocyte currents of wildtype Kv3.1a with (+) and without (-) the C-terminal FLAG tag. The voltage protocol and scale bars are as described for panel A.

**(E)** G-V curves for wildtype Kv3.1a with (+) and without (-) the C-terminal FLAG tag. Data are averages from 11 and 10 oocytes, respectively.

**(F-H)** Tables with mean  $V_{0.5}$  and  $z$  values determined from the G-V curves in main Figure 4 and panel B, indicating the number of oocytes ( $n$ ) analyzed for each construct.

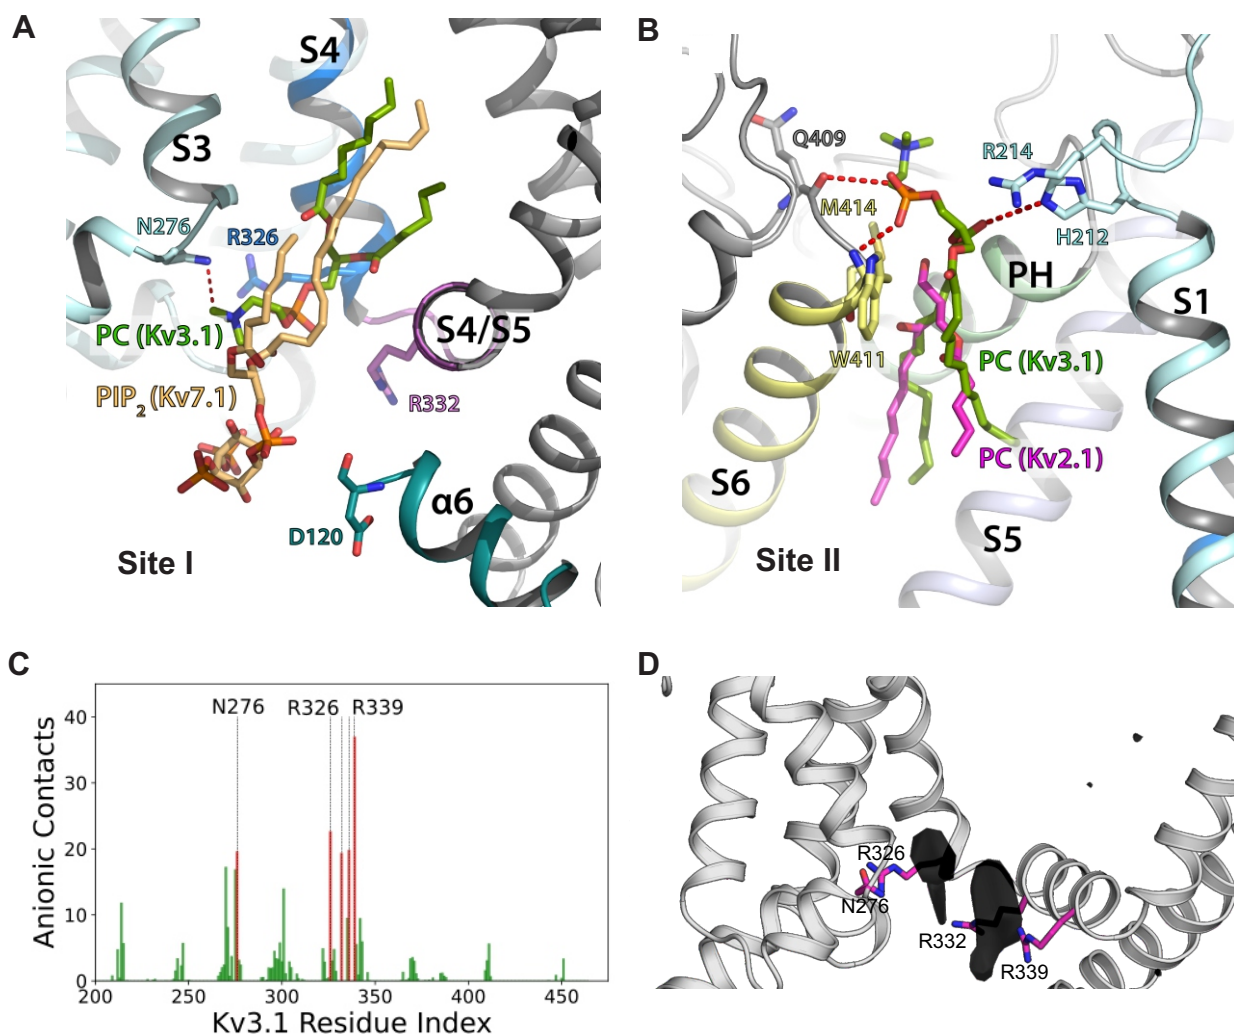

### Supplemental Figure S13. Analysis of lipid/protein interactions in the human Kv3.1a channel.

(A) Lipid-protein interactions at Site I: a phospholipid (PC, green sticks) is bound near the S4/S5 linker (purple) and voltage-sensing helix S4 (blue) of Kv3.1a. The binding site exhibits similarity to the known PIP<sub>2</sub> (wheat-coloured sticks) binding site in the structure of Kv7.1 (pdb: 6V01).

(B) Lipid-protein interactions at Site II: a phospholipid (PC, green sticks) is bound at the interface between S6 (yellow) and PH (green) in Kv3.1a compared to phosphatidylcholine (PC, pink sticks) in the Kv1.2/Kv2.1 structure (pdb: 4JTC).

C, D: MD simulations demonstrate that anionic lipids predominate interactions at lipid site I. In contrast, no lipid preferentially localizes to site II.

(C) Normalized number of contacts between Kv3.1a residues and headgroups of PS/PIP<sub>2</sub>. A contact was assumed if a residue's bead was within 5.5 Å of the lipid headgroup's bead and the contacts were subsequently averaged across the five subunits. Residues with a contact frequency of >33% are colored red.

(D) Densities of the anionic lipids calculated from CG simulations illustrated at one of the subunit interfaces at an isosurface value of 4.0 molecules/nm<sup>3</sup>.

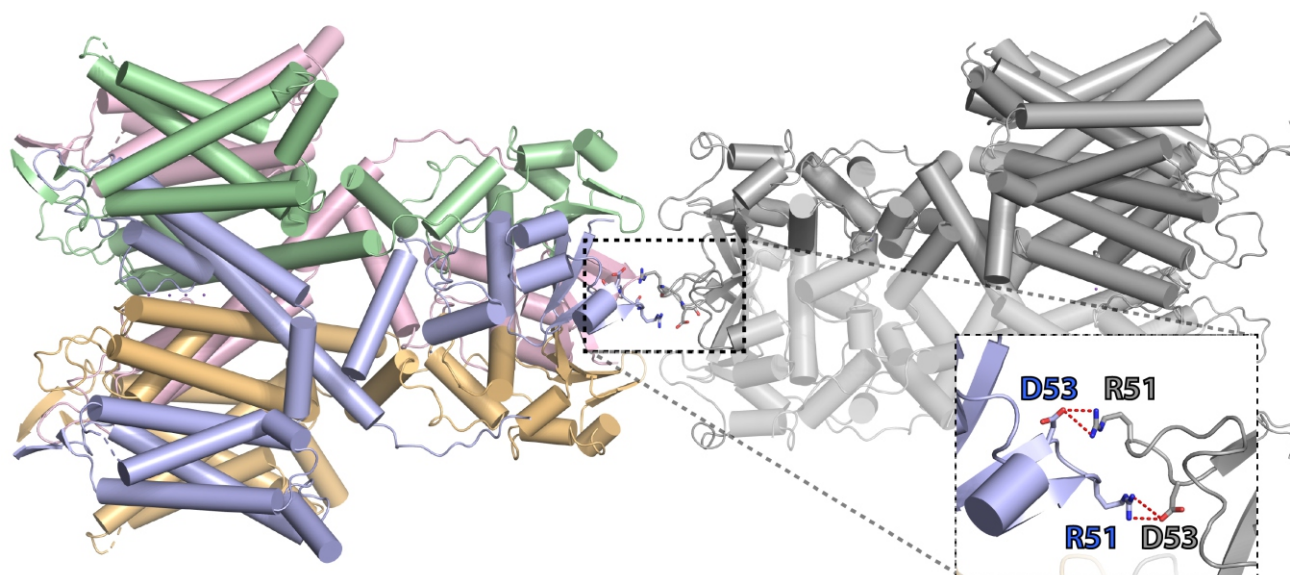

**Supplemental Figure S14. Illustration of dimer interface interactions for a subset of particles forming Kv3.1a dimers in the dataset with 400  $\mu\text{M}$   $\text{ZnCl}_2$ .**

Cartoon representation of the Kv3.1a dimer arrangement observed for a subset of particles present in the  $\text{ZnCl}_2$ -containing EM dataset.

Inset: Close-up showing that the dimer interaction is facilitated by stabilizing salt bridges between the side chains of D51 and R52 in the cytoplasmic T1 domain.



## Supplementary Results & Discussion

### Kv3.1a/Zn structure does not support evidence for secondary Zn-binding sites

Gu *et al.* report that zinc reversibly binds to Kv3.1 at several sites other than T1 domain's zinc finger and this has various effects on ion channel activity, depending on where the sites are located [1]. Additionally, our structures suggest another pocket resembling zinc finger motif formed by H60, H66 and D81. Therefore, we collected datasets of Kv3.1 in the presence of 400  $\mu$ M ZnCl<sub>2</sub> or 1 mM EDTA to resolve any extra zinc-binding sites which may exist in Kv3.1a. However, no conformational change of Kv3.1a was observed between the two maps and no inorganic ion was seen in the ZnCl<sub>2</sub> sample in the four suspected sites (H60/D81, C208/H212, H381/H383 and H459). The first hypothesis to explain this is that zinc ions do not bind to Kv3.1 other than the zinc finger motif in the near-open state. There is also the possibility that zinc ions do not bind tightly to the suspected sites.

While we did not find evidence for additional zinc-binding sites with our structural biology efforts, we serendipitously discovered a potential cause of higher-order dimerisation seen with some tetrameric ion channels (Suppl. Figure S3 B). Ion channels with T1 domain often show dimerisation at the distal end of T1 domain, for example a plant hyperpolarisation-activated K<sup>+</sup> channel KAT1 [2]. On visual examination of electron micrographs, we found that Kv3.1a shows increased dimerisation in the presence of ZnCl<sub>2</sub> but does not form a dimer with 1 mM EDTA. Reconstruction of the dimer showed that this oligomer was stabilised by R51 and D53 of one subunit interacting with D53 and R51 with the other subunit, respectively (Supplementary Figure S14). It is beyond the scope of this study to investigate the mechanism of such oligomerisation and its physiological significance; however our observation provides basis for further exploration of such feature.

### Small molecules occupy the aqueous cavity below Kv3.1 selectivity filter

We observe non-peptide density in the aqueous cavity on the cytoplasmic side of selectivity filter of Kv3.1a. Although the shape of the density is probably distorted due to its location on the four-fold symmetry axis, the generally tubular shape of this density parallel to the symmetry axis appears to be a genuine feature of this small molecule. This density fits well with the shape and size of polyamines such as spermidine coordinating with water, as well as short-chain phospholipids and free fatty acids. Similar densities are also present in the cytoplasmic cavities of Kv1.2/2.1 chimera [5], NavAb [6], TRAAK [7], and KirBac3.1 [8] channels, all of them in the open state, suggesting that the presence of small molecules at this site is a common feature for ion channels.

Some features of this aqueous cavity suggests this molecule being a polyamine. First, the surface of this cavity is strongly negatively charged (Suppl. Figure S10 A), an ideal environment for occupation by positively charged molecules. Although there is no report of Kv3.1 (or any Shaker superfamily channel) being modulated by polyamines, they are known open-pore blockers of inward-rectifying potassium channels (such as KirBac3.1) by occupying analogous site [8]. Interestingly, all known small molecule pore-blockers of Kv3.1 such as tetraethylammonium (TEA), 4-aminopyridine (4-AP), 3,4-diaminopyridine (3,4-DAP), and

dimethylguanidine (DMG) feature amine group and are thought to occupy this aqueous cavity. These provide circumstantial evidence for this molecule being an amine derivative.

There is also the possibility of this molecule being a phospholipid or free fatty acid. While there is little structural evidence of this unlike the polyamine hypothesis, functional data exist for the modulation of Shaker superfamily channels by free fatty acids. For example, arachidonic acid is known to inhibit Kv4.2 and Kv1.4 [9]. It is also a rationally most sensible explanation as the aqueous cavity is still located within the transmembrane domain and phospholipids have been observed partially occupying this cavity in Nav1.4, albeit with a significantly different binding mode [10]. It is also possible that a detergent is trapped in the open pore, similar to the configuration observed in the Nav1.4 structure from electric eel [11]. In contrast to the Nav1.4 structure where the pseudo 4-fold symmetry is broken due to the complex formation with the  $\beta$ 1-subunit and the shape of the density matches well with a digitonin molecule, the 4-fold symmetrical appearance of the densities below the selectivity filter in our Kv3.1a structure could be an EM processing artefact. Because of its location on the 4-fold axis of symmetry, the density from the bound molecule is possibly distorted and may not faithfully resemble the shape of a detergent/lipid/free fatty acid, even if the data is processed in C1.

We performed metabolomics mass spectrometry in an effort to determine the identity of this molecule (data not shown), however the result was inconclusive. We did not detect presence of polyamines or other unique small molecules, however this might have been due to the molecules still being trapped in the protein as it collapsed in the denaturation process. We detected a number of fatty acids, most notably eicosanoic acid, however they might have been products of the fragmentation of annular phospholipids. Therefore, we could not ascertain the identity of this molecule and therefore excluded it from structural model despite its potential importance in ion channel function.

## References

1. Gu, Y., J. Barry, and C. Gu, *Kv3 channel assembly, trafficking and activity are regulated by zinc through different binding sites*. J Physiol, 2013. **591**(10): p. 2491-507.
2. Clark, M.D., et al., *Electromechanical coupling in the hyperpolarization-activated K*. Nature, 2020. **583**(7814): p. 145-149.
3. Wang, H., et al., *Structural basis for modulation of Kv4 K<sup>+</sup> channels by auxiliary KChIP subunits*. Nat Neurosci, 2007. **10**(1): p. 32-9.
4. Pioletti, M., et al., *Three-dimensional structure of the KChIP1-Kv4.3 T1 complex reveals a cross-shaped octamer*. Nat Struct Mol Biol, 2006. **13**(11): p. 987-95.
5. Matthies, D., et al., *Single-particle cryo-EM structure of a voltage-activated potassium channel in lipid nanodiscs*. Elife, 2018. **7**.
6. Wisedchaisri, G., et al., *Resting-State Structure and Gating Mechanism of a Voltage-Gated Sodium Channel*. Cell, 2019. **178**(4): p. 993-1003 e12.
7. Brohawn, S.G., E.B. Campbell, and R. MacKinnon, *Physical mechanism for gating and mechanosensitivity of the human TRAAK K<sup>+</sup> channel*. Nature, 2014. **516**(7529): p. 126-30.
8. Clarke, O.B., et al., *Domain reorientation and rotation of an intracellular assembly regulate conduction in Kir potassium channels*. Cell, 2010. **141**(6): p. 1018-29.

9. Angelova, P.R. and W.S. Müller, *Arachidonic acid potently inhibits both postsynaptic-type Kv4.2 and presynaptic-type Kv1.4 IA potassium channels*. Eur J Neurosci, 2009. **29**(10): p. 1943-50.
10. Pan, X., et al., *Structure of the human voltage-gated sodium channel Na*. Science, 2018. **362**(6412).
11. Yan, Z., et al., *Structure of the Nav1.4-beta1 Complex from Electric Eel*. Cell, 2017. **170**(3): p. 470-482 e11.
12. Sun, J. and R. MacKinnon, *Structural Basis of Human KCNQ1 Modulation and Gating*. Cell, 2020. **180**(2): p. 340-347.e9.
13. Banerjee, A., et al., *Structure of a pore-blocking toxin in complex with a eukaryotic voltage-dependent K(+) channel*. Elife, 2013. **2**: p. e00594.
14. Gao, S., et al., *Employing NaChBac for cryo-EM analysis of toxin action on voltage-gated Na*. Proc Natl Acad Sci U S A, 2020. **117**(25): p. 14187-14193.
